# Supplementary material for: Optical waveguides from 4-aryl-4H-1,2,4-triazole-based supramolecular structures
Source: Royal Society of Chemistry journal article supplement (doi:10.1039/c2cc37381e), 2012-11-26
Supplement: c2cc37381e.pdf [file c2cc37381e.pdf]

## Supporting Information

### Optical Waveguide from 4-Aryl-4H-1,2,4-triazole-based Supramolecular Structures

David Cáceres<sup>a</sup>, Cristina Cebrián<sup>a</sup>, Antonio M. Rodríguez<sup>a</sup>, José R. Carrillo<sup>a</sup>, Ángel Díaz-Ortiz<sup>a</sup>, Pilar Prieto<sup>a\*</sup>, Fátima Aparicio,<sup>b</sup> Fátima García,<sup>b</sup> Luis Sánchez<sup>b\*</sup>

<sup>a</sup>*Departamento de Química Inorgánica, Orgánica y Bioquímica, Facultad de Ciencias y Tecnologías Químicas, Universidad de Castilla-La Mancha, Campus Universitario, 13071 Ciudad Real (Spain).*

<sup>b</sup>*Departamento de Química Orgánica, Facultad de Ciencias Químicas, Universidad Complutense de Madrid, E-28040 Madrid (Spain).*

#### Contents:

|                                                    |      |
|----------------------------------------------------|------|
| 1.- Supplementary Figures                          | S-2  |
| Synthetic scheme                                   | S-2  |
| Concentration dependent <sup>1</sup> H NMR spectra | S-2  |
| UV-Vis and PL spectra of compound <b>2</b>         | S-3  |
| SEM images                                         | S-3  |
| Optimized geometries                               | S-4  |
| 2.- Computational section                          | S-5  |
| 3.- Experimental section                           | S-7  |
| 4. Synthetic details and characterization          | S-8  |
| 5. Collection of spectra                           | S-10 |
| 6. Z-matrix coordinates                            | S-12 |

### 3. Supplementary Figures and Tables

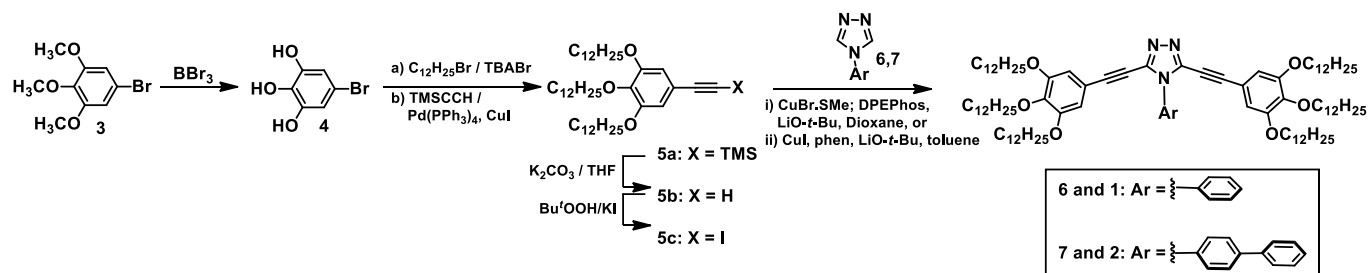

Scheme S1. Synthesis of 4-aryl-4H-1,2,4-triazoles **1** and **2**.

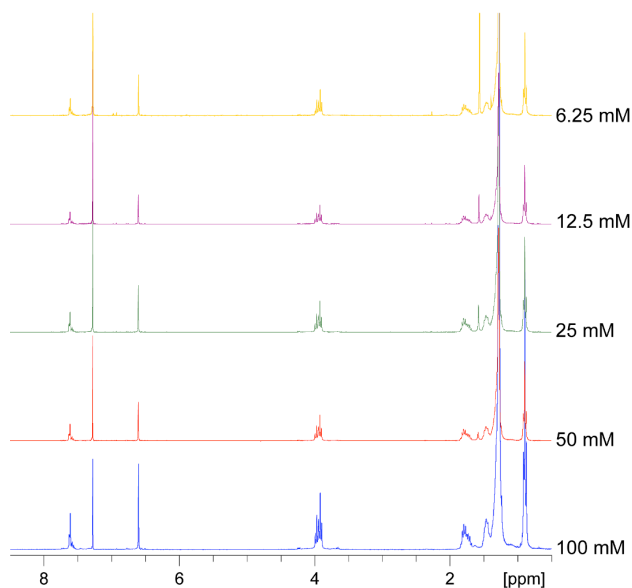

Figure S1. Partial concentration-dependent  $^1\text{H}$  NMR spectra of **1** in  $\text{CDCl}_3$  (300 MHz, 298 K).

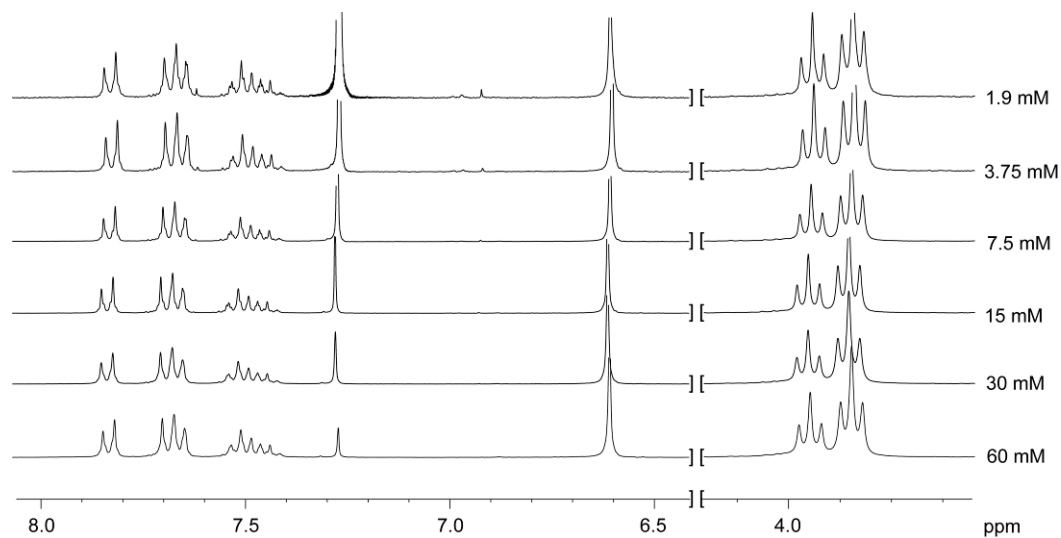

Figure S2. Partial concentration-dependent  $^1\text{H}$  NMR spectra of **2** in  $\text{CDCl}_3$  (300 MHz, 298 K).

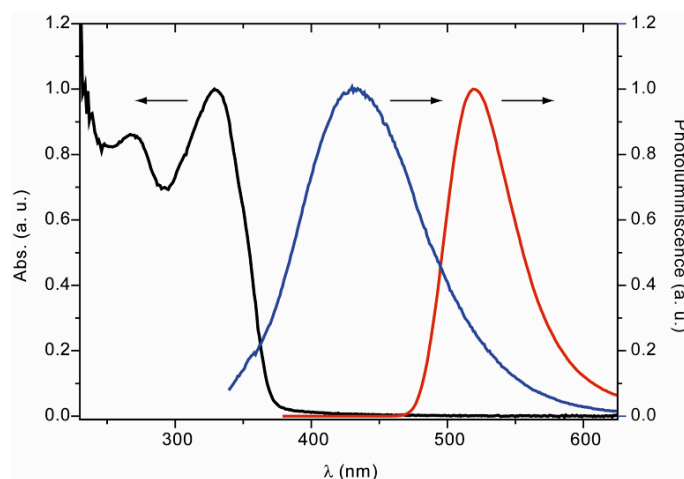

**Figure S3.** Normalized UV-Vis and PL spectra of the triazole **2** in solution (298 K,  $\text{CHCl}_3$ ,  $1 \times 10^{-4}$  M) (black and red lines, respectively) and PL the aggregates formed by **2** in acetonitrile (blue line).

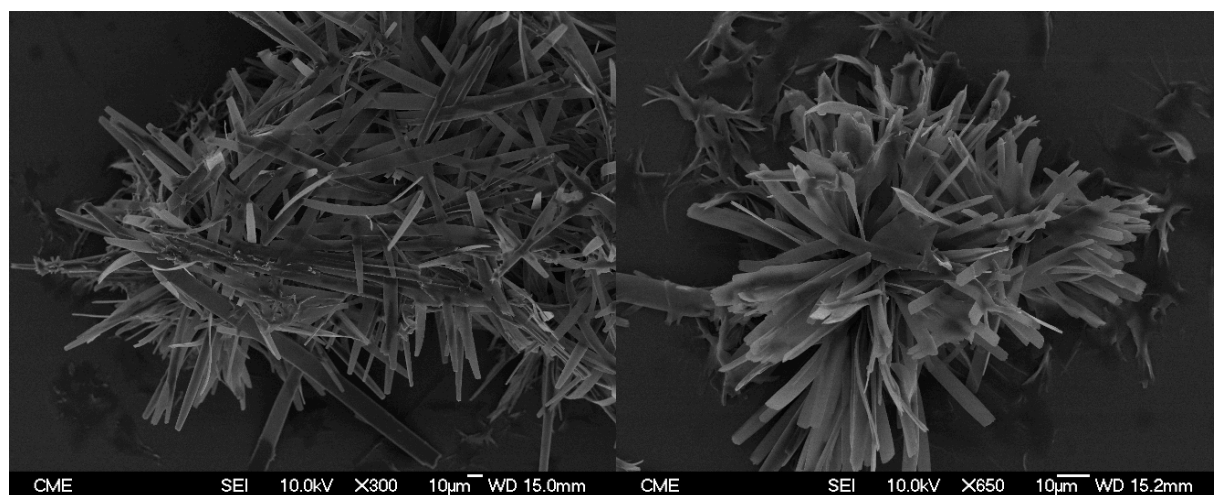

**Figure S4.** SEM images of the aggregated formed upon self-assembly of triazole **1** in acetonitrile (glass substrate, 298 K).

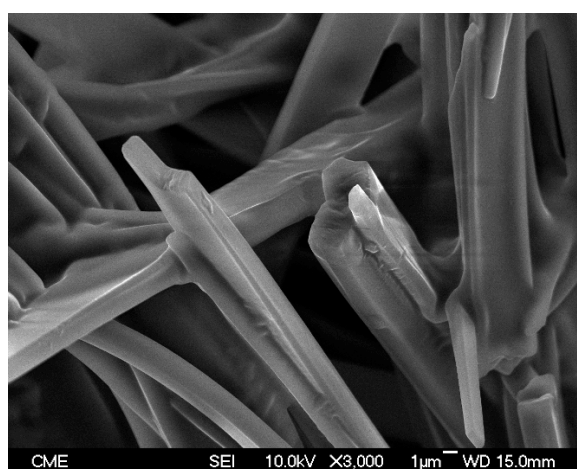

**Figure S5.** SEM image of the aggregated formed upon self-assembly of triazole **2** in acetonitrile (glass substrate, 298 K).

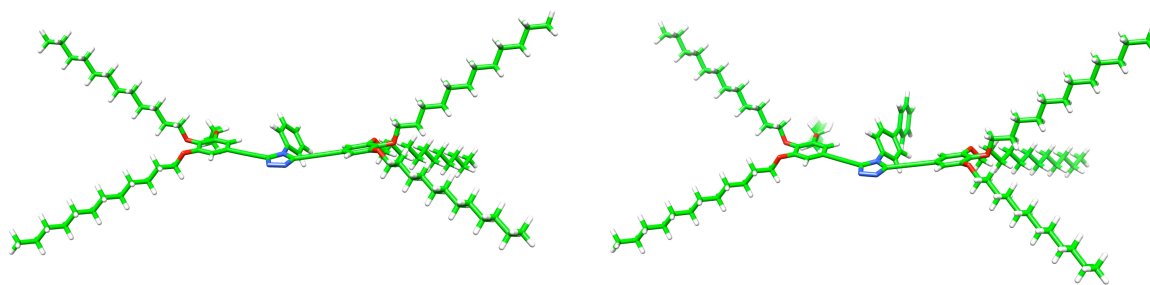

**Figure S6.** Side view of the calculated geometry of compounds **1** (left) and **2** (right).

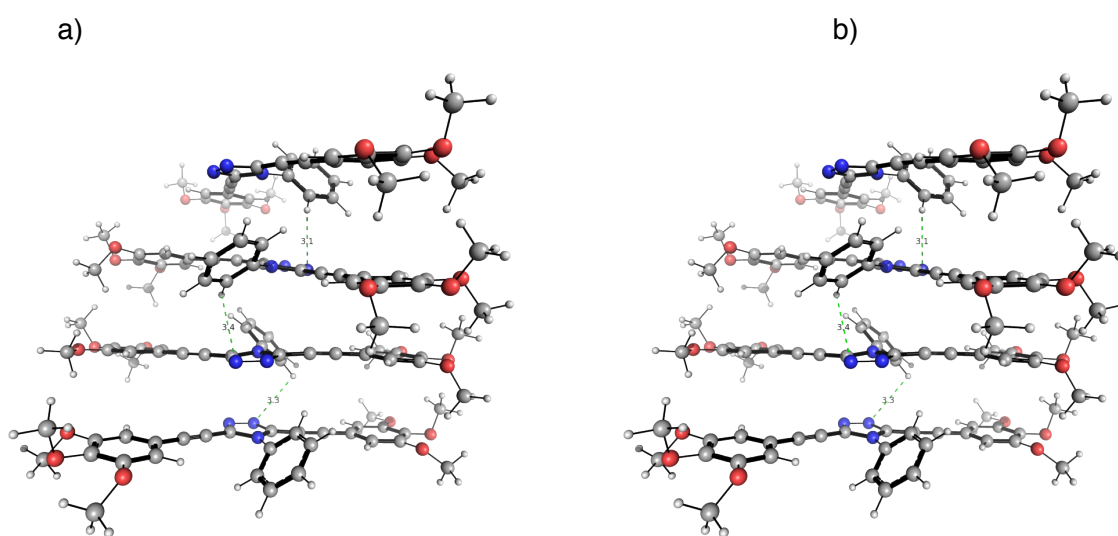

**Figure S7.** Two possible aggregation disposition of 4-phenyl-4*H*-1,2,4-triazol optimized at MPWB1K/6-31G\*\* level of theory. a) Tetramer **A**, b) Tetramer **B**.

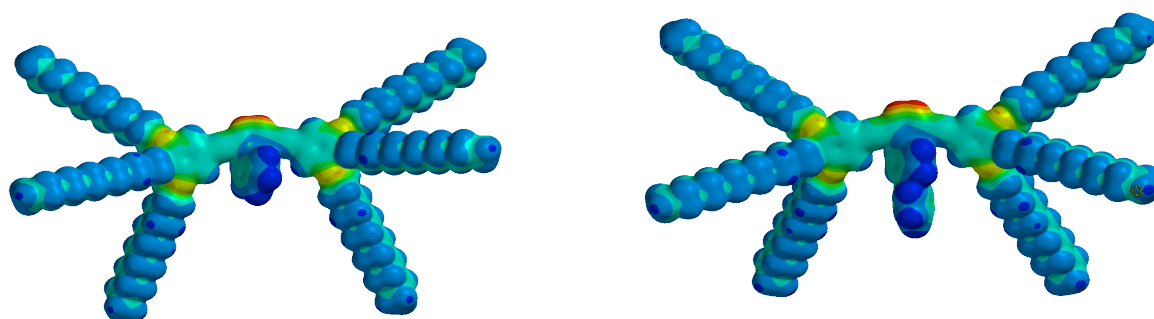

**Figure S8.** Molecular electrostatic potential calculated for compounds **1** (left) and **2** (right).

## 2. Computational Section.

All calculations included in this paper were carried out using the GAUSSIAN 09<sup>1</sup> series of programs. In order to include electron correlation at a reasonable computational cost, Density Functional Theory (DFT)<sup>2</sup> was used. Some of these calculations were carried out by means of the three-parameter functional developed by Becke,<sup>3</sup> which is usually denoted as B3LYP, with the standard 6-31G\* basis set.<sup>4</sup> Other ones, were performed using the hybrid meta exchange-correlation MPWB1K density functional<sup>5</sup> developed by Truhlar and the 6-31\*\* basis set.<sup>6</sup>

Initially, the geometry of compounds **1** and **2** were optimized at B3LYP/6-31G\* (Figure S6), and the corresponding electrostatic potential maps were computed (Figure S8). The presence of the aromatic units and the long peripheral paraffinic chains in compounds **1** and **2** should favor the formation of organized supramolecular structures by the operation of  $\pi$ - $\pi$  stacking and van der Waals interactions. Moreover, the charge distribution showed in the electrostatic potential maps indicated that the triazole rings should be alternated in the supramolecular assembly, in order to avoid the electrostatic interaction. To modelized the supramolecular assembly, we chosed a simplified structure in order to minimized the computational cost. In the monomer **1** the pedant dodecyl chains were replaced for metoxy groups. The widely used Becke's three-parameters B3LYP funtional is not adecuate to calculate the formation of supramolecular aggregates because it fails in describing dispersion forces and does not properly account for stacking  $\pi$ - $\pi$  interactions. For these reason is necessary the employment the MPWB1K funtional. Truhlar et al. have reported a very comprensive study on a large data base of non-covalent interacting systems using different funtionals and concluded that the MPW1BK gives good performance for  $\pi$ - $\pi$  stacking interactions and intermolecular hydrogen bonds using moderate basis sets. Recently, some authors have been employed succesfully this funtional.<sup>7</sup> The optimized monomer was used in a second step to generate the dimer. At this point it had performed an optimization of intermolecular distance and the rotation angle for two triazol rings. Single points calculations for diferents values were carried out. All the results are showed in Figure S9.

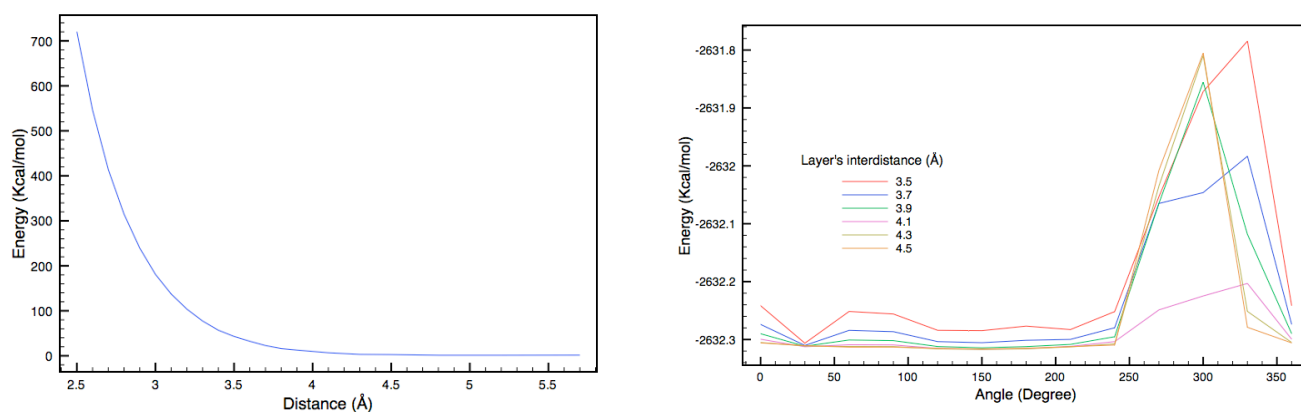

**Figure S9.** a) Intermolecular distance optimization. b) Torsion intermolecular angle optimization.

The optimal intermolecular distance between two monomers was 2.7 Å and the rotation angle was 150°. Taken in account these results, the trimer was generated in two different dispositions, trimer **A** and **B**. In trimer **A**, the triazol ring of the third unit was rotated 150° about the perpendicular axis to the molecular plane, possessing a similar disposition to unit **1**. On the contrary, in trimer **B** the third unit was rotated 150° in the same direction than that of the second unit, resulting in a helical organization. For the tetramer we considered again the same both dispositions. The geometries of all trimers and tetramers were fully relaxed. The optimized structures of both tetramers are shown in Figure S7. The obtained results indicated that the tetramer **A** is 9 kcal/mol more stable than tetramer **B**. A plausible explanation for this could be the existence of a threefold intermolecular hydrogen bonding between the N-1 and the *o*-H of the substituted phenyl at N-4. Moreover, the stabilization energy (in kcal/mol) per monomer unit for each supramolecular structure was computed. These energies are collected in Table S1.

**Table S1**

| Structure | MPWB1K/6-31G** | MPWB1K/6-31G**//<br>MPWB1K/cc-pVTZ |
|-----------|----------------|------------------------------------|
| Monomer   | 0,00           | 0,00                               |
| Dimer     | -12,12         | -9,61                              |
| Trimer    | -27,08         | -20,44                             |
| Tetramer  | -34,11         | -25,02                             |

These values possess a basis set superposition error (BSSE),<sup>8</sup> which is always present in a supramolecular calculation of interacting molecular fragments. It has been recently shown that the best way of dealing with the BSSE is not to use CP corrections,<sup>9</sup> which usually overcorrects for BSSE, but to make a computational effort by increasing the basis set. For this reason, the total energies for the aggregates were recalculated using MPWB1K/6-31G\*\*// MPWB1K/cc-pVTZ. The employment of this more extended cc-pVTZ basis set<sup>10</sup> led to a decrease of the BSSE near to 17-19%.

### 3. Experimental section

**General.** Commercially available reagents were used without further purification. Microwave irradiations were performed in a Discover® (CEM) focused microwave reactor. Yields refer to isolated and purified products. Reactions were monitored by thin-layer chromatography carried out on silica gel plates (60F-254) visualized under UV light. Column chromatography was performed on silica gel 60, (230-400 mesh). <sup>1</sup>H- and <sup>13</sup>C-NMR spectra were recorded on a Varian Unity 500 or on a Bruker Avance 300 spectrometers at 298 K. Chemical shifts are reported in ppm (δ) using Me<sub>4</sub>Si as the internal reference and coupling constants J are given in Hz. MALDI-TOF mass spectra were measured with a Bruker Autoflex II TOF/TOF spectrometer (Bremen, Germany) by using dithranol as the matrix. Samples co-crystallized with the matrix on the probe were ionized with a nitrogen laser pulse (337 nm) and accelerated under 20 kV with time-delayed extraction before entering the time-of-flight mass spectrometer. Matrix (10 mg/mL) and sample (1 mg/mL) were separately dissolved in methanol and mixed in a matrix/sample ratio ranging from 100:1 to 50:1. Typically, a 5 μL mixture of matrix and sample was applied to a MALDI-TOF MS probe and air-dried. MALDI-TOF MS in positive reflector mode was used for all samples. External calibration was performed by using Peptide Calibration Standard II (covered mass range: 700–3200 Da), Protein Calibration Standard I (covered mass range: 5000–17500 Da) and Protein Calibration Standard II (covered mass range: 20000–70000 Da) from Care (Bruker). The applied peak (m/z determination) detection method was the threshold centroid at 50% height of the peak maximum. SEM images were obtained from on a JEOL JSM 6335F microscope working at 10kV. Fluorescence images were recorded on a Leica TCE SP2 confocal microscope.

#### 4. Synthetic details and characterization

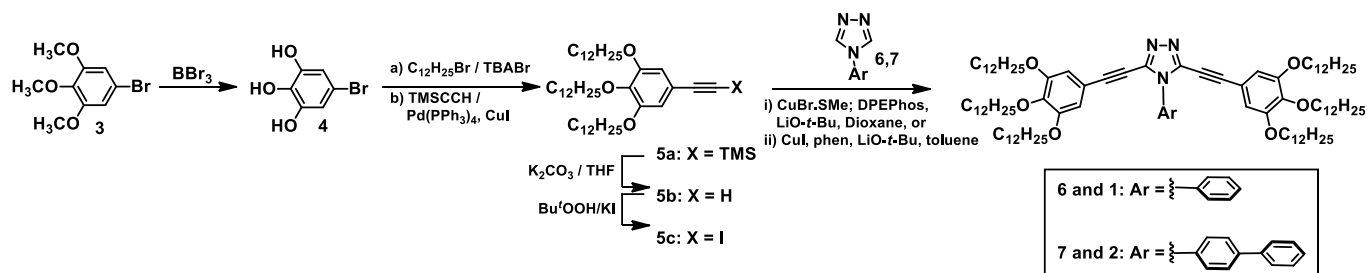

5-bromo-1,2,3-trimethoxybenzene (**3**) was purchased from a commercial source. Compounds **4**, **5a-c** and **6** were prepared according to previously reported synthetic procedures<sup>11</sup> and showed identical spectroscopic properties to those reported therein.

#### 4-phenyl-3,5-bis((3,4,5-tris(dodecyloxy)phenyl)ethynyl)-4H-1,2,4-triazole (**1**)

A flame dried tube under argon was charged with 4-phenyl-4H-1,2,4-triazole (0.019 g, 0.128 mmol), CuBr·SMe<sub>2</sub> (0.0078 g, 0.0384 mmol), DPEPhos (0.02 g, 0.0384 mmol) and Li<sup>t</sup>BuO (0.043 g, 0.537 mmol). After that, a solution of 1,2,3-tris(dodecyloxy)-5-(iodoethynyl)benzene (0.4 g, 0.512 mmol) in dry dioxane (4 mL) was added to the mixture. The sealed tube with a Teflon cap containing the resulting mixture was irradiated at 130°C during 30 min at 300 W. The reaction mixture was diluted with EtOAc (2mL) and water was added (5 mL). This mixture was extracted with EtOAc (3 x 5 mL) and the combined organic layers were dried over MgSO<sub>4</sub>. Solvents were removed under reduced pressure and the crude was purified by flash chromatography on silica gel using hexane/EtOAc (98/2) as a solvent mixture to afford compound **1** (0.116 g, 62 %). <sup>1</sup>H-RMN (CDCl<sub>3</sub>, 500 MHz): 7.59-7.60 (m, 5H, H-Ph), 6.58 (s, 4H, 2 x o-H), 3.95 (t, 4H, *J* = 6.6 Hz, 2 x CH<sub>2</sub>), 3.90 (t, 8H, *J* = 6.5 Hz, 4 x CH<sub>2</sub>), 1.76-1.79 (m, 12H, 6 x CH<sub>2</sub>), 1.43-1.45 (m, 12H, 6 x CH<sub>2</sub>), 1.22-1.33 (m, 96H, CH<sub>2</sub>), 0.87-0.89 (t, 18H, *J* = 6.7 Hz, 6 x CH<sub>3</sub>). <sup>13</sup>C-RMN (CDCl<sub>3</sub>, 500 MHz): 14.09, 22.67, 26.05, 29.25, 29.35, 29.37, 29.55, 29.63, 29.65, 29.69, 29.73, 30.28, 31.92, 69.24, 73.62, 73.96, 97.97, 110.49, 114.76, 126.31, 129.21, 133.48, 139.27, 140.18, 140.63, 153.04. MS (electrospray) *m/z* (%) 1450,94 (92) 1451,94 (100) [M+]<sup>+</sup>, 1452,94 (40). HRMS (MALDI-TOF): calcd. for C<sub>96</sub>H<sub>160</sub>N<sub>3</sub>O<sub>3</sub> [M+H]<sup>+</sup>, 1451.2307; found, 1451.2324.

#### 4-([1,1'-biphenyl]-4-yl)-3,5-bis((3,4,5-tris(dodecyloxy)phenyl)ethynyl)-4H-1,2,4-triazole (**2**)

A flame dried tube under argon was charged with 4-([1,1'-biphenyl]-4-yl)-4H-1,2,4-triazole (0.028 g, 0.128 mmol), CuBr·SMe<sub>2</sub> (0.0078 g, 0.0384 mmol), DPEPhos (0.02 g, 0.0384 mmol) and Li<sup>t</sup>BuO (0.043 g, 0.537 mmol). After that, a solution of 1,2,3-tris(dodecyloxy)-5-(iodoethynyl)benzene (0.4 g, 0.512 mmol) in dry dioxane (4 mL) was added to the mixture. The sealed tube with a Teflon cap containing the resulting mixture was irradiated at 130°C during 30 min at 300 W. The reaction mixture was diluted with EtOAc (2mL) and water (4 mL) was added. This mixture was extracted with EtOAc (3 x 5mL) and the combined organic layers were dried over MgSO<sub>4</sub>. Solvents were removed under reduced pressure and the crude was purified by flash chromatography on silica gel using hexane/EtOAc (98/2) as a solvent



mixture to afford compound **2** (0.133 g, 68 %).  $^1\text{H}$ -RMN ( $\text{CDCl}_3$ , 500 MHz): 7.82 (d, 2H,  $J = 8.4$  Hz,  $m'$ -H), 7.67 (d, 2H,  $J = 8.4$  Hz,  $o'$ -H), 7.64 (d, 2H,  $J = 7.3$  Hz,  $o''$ -H), 7.49 (t, 2H,  $J = 7.3$  Hz,  $m''$ -H), 7.43 (t, 1H,  $J = 7.3$  Hz,  $p''$ -H), 6.60 (s, 4H,  $o$ -H), 3.94 (t, 4H,  $J = 6.6$  Hz, 2 x O-CH<sub>2</sub>), 3.86 (t, 8H,  $J = 6.3$  Hz, 4 x O-CH<sub>2</sub>), 1.73-1.69 (m, 12H, 6 x CH<sub>2</sub>), 1.41-1.37 (m, 12H, 6 x CH<sub>2</sub>), 1.29-1.23 (m, 96H, CH<sub>2</sub>), 0.88 (t, 18H,  $J = 6.6$  Hz, 6 x CH<sub>3</sub>).  $^{13}\text{C}$ -RMN ( $\text{CDCl}_3$ , 125 MHz): 14.09, 22.67, 26.00, 26.02, 29.19, 29.35, 29.37, 29.53, 29.59, 29.61, 29.64, 29.66, 29.68, 29.69, 29.71, 30.26, 69.1, 73.6, 74.0, 98.21, 110.32, 114.73, 126.67, 127.0, 127.71, 128.27, 129.14, 132.48, 139.38, 140.19, 142.59, 153.03. HRMS (MALDI-TOF): calcd. for  $\text{C}_{102}\text{H}_{164}\text{N}_3\text{O}_3$  [M+H]<sup>+</sup>, 1527.2620; found, 1527.2662.

## 5. Collection of spectra

$^1\text{H}$  NMR ( $\text{CDCl}_3$ , 300 MHz, 298 K) of compound **1**.

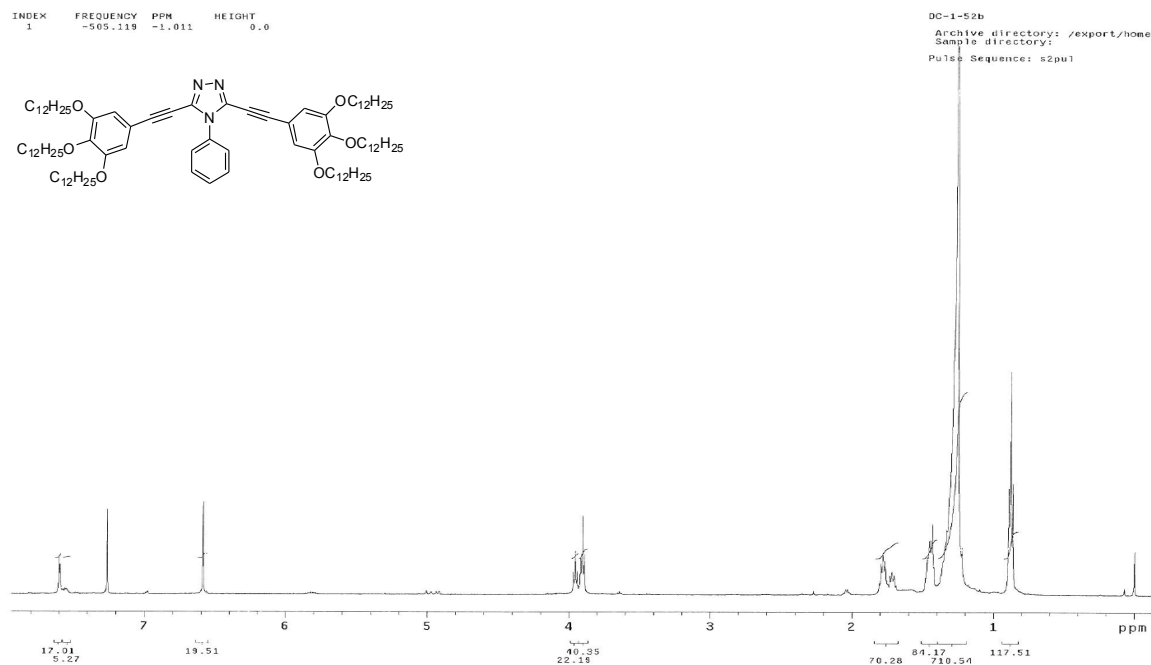

$^{13}\text{C}$  NMR ( $\text{CDCl}_3$ , 75 MHz, 298 K) of compound **1**.

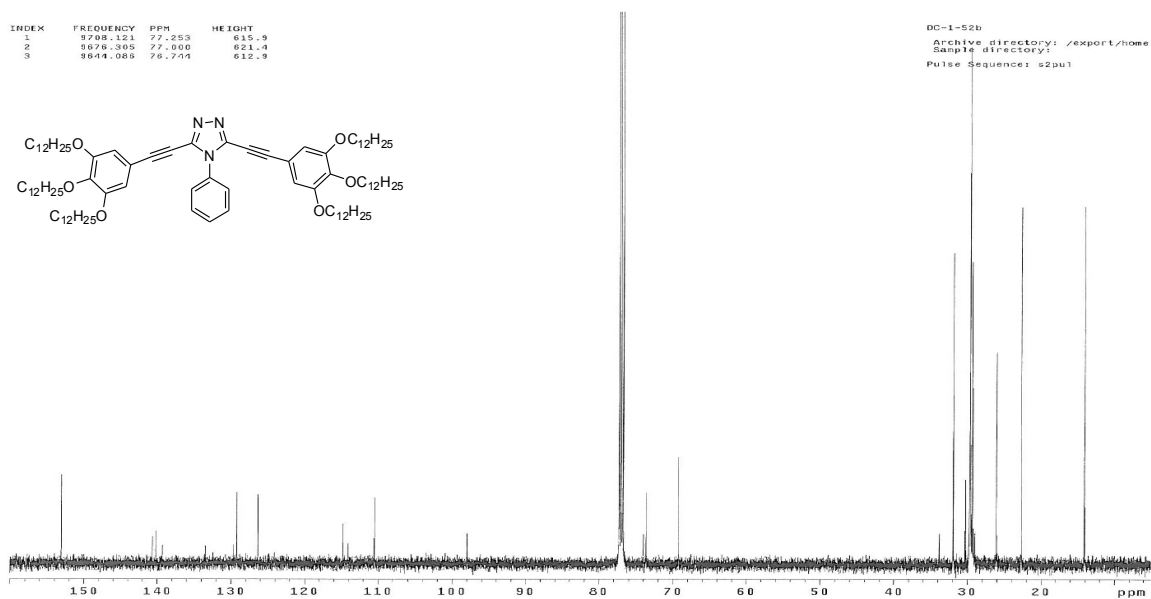

$^1\text{H}$  NMR ( $\text{CDCl}_3$ , 300 MHz, 298 K) of compound **2**.

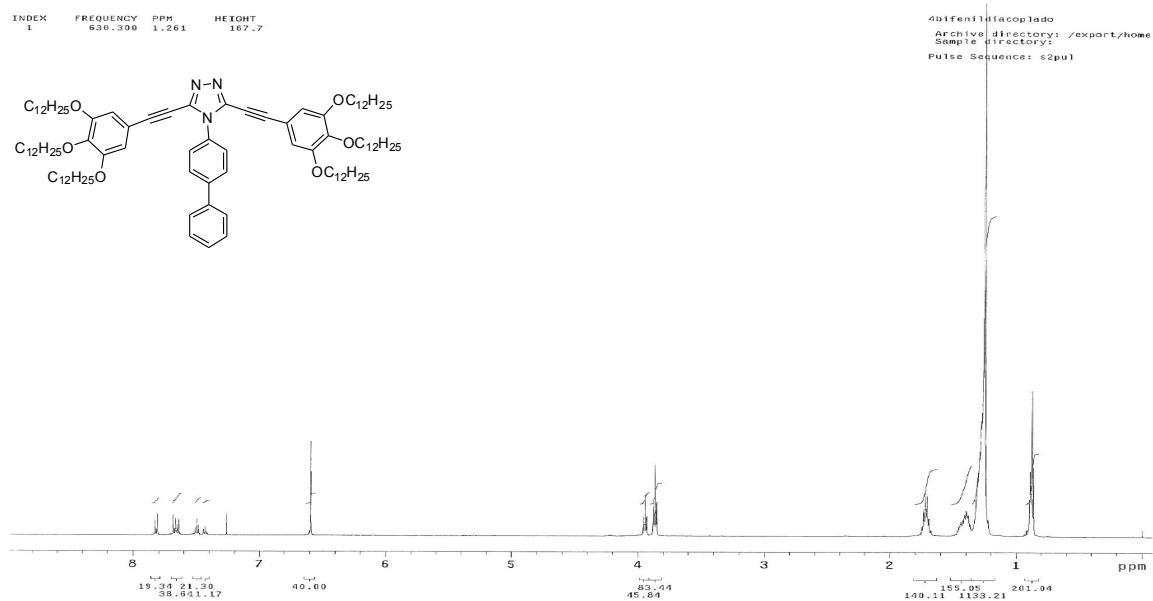

$^{13}\text{C}$  NMR ( $\text{CDCl}_3$ , 75 MHz, 298 K) of compound **2**.

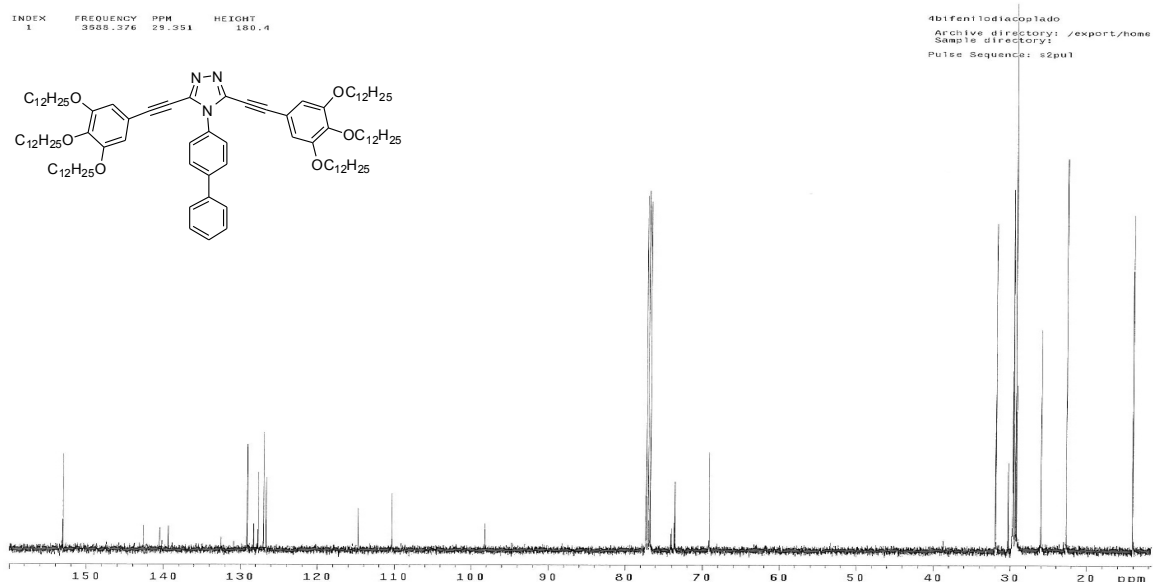

## 6. Z-matrix coordinates of computed structures.

### Compound 1

| Center<br>Number | Atomic<br>Number | Atomic<br>Type | Coordinates (Angstroms) |           |           |
|------------------|------------------|----------------|-------------------------|-----------|-----------|
|                  |                  |                | X                       | Y         | Z         |
| 1                | 6                | 0              | -1.111969               | -2.814262 | -0.481132 |
| 2                | 6                | 0              | 1.071059                | -2.801102 | -0.543644 |
| 3                | 7                | 0              | -0.021539               | -1.967409 | -0.375978 |
| 4                | 7                | 0              | -0.697742               | -4.058528 | -0.702087 |
| 5                | 7                | 0              | 0.659831                | -4.050961 | -0.737153 |
| 6                | 6                | 0              | -0.022830               | -0.558171 | -0.143636 |
| 7                | 6                | 0              | -0.689378               | -0.040127 | 0.970193  |
| 8                | 6                | 0              | 0.642239                | 0.289767  | -1.033676 |
| 9                | 6                | 0              | -0.693128               | 1.337440  | 1.187195  |
| 10               | 1                | 0              | -1.192966               | -0.711950 | 1.656925  |
| 11               | 6                | 0              | 0.643480                | 1.664460  | -0.799568 |
| 12               | 1                | 0              | 1.145738                | -0.127180 | -1.899430 |
| 13               | 6                | 0              | -0.025535               | 2.191202  | 0.306975  |
| 14               | 1                | 0              | -1.211318               | 1.740722  | 2.052491  |
| 15               | 1                | 0              | 1.160669                | 2.324261  | -1.490407 |
| 16               | 1                | 0              | -0.026309               | 3.263152  | 0.482990  |
| 17               | 6                | 0              | 2.412686                | -2.377025 | -0.465530 |
| 18               | 6                | 0              | 3.577667                | -2.038654 | -0.387233 |
| 19               | 6                | 0              | -2.453530               | -2.395736 | -0.379947 |
| 20               | 6                | 0              | -3.616146               | -2.056495 | -0.274589 |
| 21               | 6                | 0              | 4.944640                | -1.659284 | -0.275147 |
| 22               | 6                | 0              | 5.317046                | -0.303231 | -0.326713 |
| 23               | 6                | 0              | 5.936015                | -2.644015 | -0.107475 |
| 24               | 6                | 0              | 6.654043                | 0.063516  | -0.189251 |
| 25               | 1                | 0              | 4.569452                | 0.472858  | -0.448095 |
| 26               | 6                | 0              | 7.271803                | -2.276644 | 0.031149  |
| 27               | 1                | 0              | 5.670716                | -3.694242 | -0.059646 |
| 28               | 6                | 0              | 7.643755                | -0.919923 | -0.004683 |
| 29               | 8                | 0              | 6.976633                | 1.397619  | -0.155992 |
| 30               | 8                | 0              | 8.205485                | -3.249546 | 0.290331  |
| 31               | 8                | 0              | 8.960587                | -0.554278 | 0.139417  |
| 32               | 6                | 0              | 7.717862                | 1.893009  | -1.287629 |
| 33               | 6                | 0              | 9.125776                | -3.546864 | -0.778408 |
| 34               | 6                | 0              | 9.387874                | -0.434117 | 1.514259  |
| 35               | 1                | 0              | 8.638216                | 1.311276  | -1.409782 |
| 36               | 1                | 0              | 7.107990                | 1.772637  | -2.195402 |
| 37               | 6                | 0              | 8.026774                | 3.360742  | -1.032739 |
| 38               | 1                | 0              | 8.557048                | -3.876818 | -1.659946 |
| 39               | 1                | 0              | 9.685793                | -2.643438 | -1.046604 |
| 40               | 6                | 0              | 10.052134               | -4.648265 | -0.285196 |
| 41               | 1                | 0              | 8.777664                | 0.332361  | 2.010170  |
| 42               | 1                | 0              | 9.225643                | -1.392666 | 2.022840  |
| 43               | 6                | 0              | 10.860129               | -0.052926 | 1.525244  |
| 44               | 6                | 0              | 8.770975                | 4.019237  | -2.201562 |
| 45               | 1                | 0              | 8.623509                | 3.437819  | -0.114250 |
| 46               | 1                | 0              | 7.084650                | 3.890474  | -0.839675 |

|     |   |   |           |           |           |
|-----|---|---|-----------|-----------|-----------|
| 47  | 6 | 0 | 11.070262 | -5.098245 | -1.341109 |
| 48  | 1 | 0 | 9.439361  | -5.501779 | 0.032817  |
| 49  | 1 | 0 | 10.575904 | -4.288978 | 0.610631  |
| 50  | 6 | 0 | 11.414348 | 0.080890  | 2.949790  |
| 51  | 1 | 0 | 10.987577 | 0.891776  | 0.980282  |
| 52  | 1 | 0 | 11.425814 | -0.814721 | 0.972590  |
| 53  | 6 | 0 | 9.106878  | 5.494547  | -1.946626 |
| 54  | 1 | 0 | 9.699853  | 3.466262  | -2.404882 |
| 55  | 1 | 0 | 8.163256  | 3.939021  | -3.114918 |
| 56  | 6 | 0 | 11.999486 | -6.207354 | -0.830373 |
| 57  | 1 | 0 | 10.539806 | -5.452643 | -2.237035 |
| 58  | 1 | 0 | 11.674077 | -4.237403 | -1.664112 |
| 59  | 6 | 0 | 12.902221 | 0.454182  | 2.989679  |
| 60  | 1 | 0 | 10.835999 | 0.838322  | 3.498791  |
| 61  | 1 | 0 | 11.264850 | -0.865870 | 3.489156  |
| 62  | 6 | 0 | 9.835886  | 6.167322  | -3.116712 |
| 63  | 1 | 0 | 8.179300  | 6.045207  | -1.731272 |
| 64  | 1 | 0 | 9.723642  | 5.573572  | -1.039277 |
| 65  | 6 | 0 | 13.024639 | -6.683650 | -1.867471 |
| 66  | 1 | 0 | 12.528752 | -5.850488 | 0.065512  |
| 67  | 1 | 0 | 11.391723 | -7.063119 | -0.501711 |
| 68  | 6 | 0 | 13.460730 | 0.570837  | 4.413527  |
| 69  | 1 | 0 | 13.479601 | -0.298546 | 2.432901  |
| 70  | 1 | 0 | 13.052966 | 1.406022  | 2.459340  |
| 71  | 6 | 0 | 10.177834 | 7.640469  | -2.858519 |
| 72  | 1 | 0 | 10.760547 | 5.612961  | -3.336147 |
| 73  | 1 | 0 | 9.215703  | 6.091913  | -4.022326 |
| 74  | 6 | 0 | 13.945956 | -7.792101 | -1.341746 |
| 75  | 1 | 0 | 12.496556 | -7.043344 | -2.763014 |
| 76  | 1 | 0 | 13.634291 | -5.829216 | -2.197252 |
| 77  | 6 | 0 | 14.949719 | 0.937769  | 4.461978  |
| 78  | 1 | 0 | 12.882943 | 1.323826  | 4.969837  |
| 79  | 1 | 0 | 13.304703 | -0.381381 | 4.942045  |
| 80  | 6 | 0 | 10.899370 | 8.317544  | -4.030999 |
| 81  | 1 | 0 | 10.802416 | 7.714947  | -1.955844 |
| 82  | 1 | 0 | 9.253697  | 8.193377  | -2.633179 |
| 83  | 6 | 0 | 14.974682 | -8.280522 | -2.369840 |
| 84  | 1 | 0 | 13.333923 | -8.643615 | -1.009069 |
| 85  | 1 | 0 | 14.472573 | -7.430411 | -0.445978 |
| 86  | 6 | 0 | 15.506855 | 1.042158  | 5.887487  |
| 87  | 1 | 0 | 15.106305 | 1.893312  | 3.939528  |
| 88  | 1 | 0 | 15.526688 | 0.187699  | 3.900764  |
| 89  | 6 | 0 | 11.244039 | 9.789719  | -3.771011 |
| 90  | 1 | 0 | 11.822262 | 7.763352  | -4.258318 |
| 91  | 1 | 0 | 10.273339 | 8.245179  | -4.932867 |
| 92  | 6 | 0 | 15.892235 | -9.387400 | -1.834272 |
| 93  | 1 | 0 | 14.449208 | -8.645214 | -3.264971 |
| 94  | 1 | 0 | 15.587590 | -7.430029 | -2.703810 |
| 95  | 6 | 0 | 16.996598 | 1.405227  | 5.940742  |
| 96  | 1 | 0 | 14.930194 | 1.792495  | 6.448647  |
| 97  | 1 | 0 | 15.347667 | 0.086521  | 6.408987  |
| 98  | 6 | 0 | 11.962660 | 10.468253 | -4.944445 |
| 99  | 1 | 0 | 10.321369 | 10.343368 | -3.541418 |
| 100 | 1 | 0 | 11.871798 | 9.861698  | -2.870305 |

|     |   |   |           |            |           |
|-----|---|---|-----------|------------|-----------|
| 101 | 6 | 0 | 16.922469 | -9.882767  | -2.857496 |
| 102 | 1 | 0 | 16.417210 | -9.021317  | -0.939321 |
| 103 | 1 | 0 | 15.278081 | -10.236136 | -1.498282 |
| 104 | 6 | 0 | 17.552418 | 1.502255   | 7.367282  |
| 105 | 1 | 0 | 17.572848 | 0.656609   | 5.376820  |
| 106 | 1 | 0 | 17.156181 | 2.362834   | 5.422921  |
| 107 | 1 | 0 | 12.884889 | 9.914057   | -5.174632 |
| 108 | 1 | 0 | 11.334423 | 10.396953  | -5.844916 |
| 109 | 6 | 0 | 12.308539 | 11.939943  | -4.684369 |
| 110 | 1 | 0 | 16.398018 | -10.251144 | -3.751790 |
| 111 | 1 | 0 | 17.536686 | -9.034473  | -3.194748 |
| 112 | 6 | 0 | 17.838712 | -10.987947 | -2.316624 |
| 113 | 1 | 0 | 16.976371 | 2.251101   | 7.931158  |
| 114 | 1 | 0 | 17.391335 | 0.544601   | 7.884600  |
| 115 | 6 | 0 | 19.042426 | 1.862980   | 7.423632  |
| 116 | 6 | 0 | 13.027760 | 12.618554  | -5.857320 |
| 117 | 1 | 0 | 12.936971 | 12.012278  | -3.783989 |
| 118 | 1 | 0 | 11.386699 | 12.495261  | -4.454778 |
| 119 | 6 | 0 | 18.868919 | -11.487864 | -3.337573 |
| 120 | 1 | 0 | 17.224633 | -11.835747 | -1.977617 |
| 121 | 1 | 0 | 18.364407 | -10.619272 | -1.423014 |
| 122 | 6 | 0 | 19.597872 | 1.956327   | 8.850496  |
| 123 | 1 | 0 | 19.204748 | 2.821869   | 6.908688  |
| 124 | 1 | 0 | 19.619317 | 1.115218   | 6.858958  |
| 125 | 6 | 0 | 13.369722 | 14.087736  | -5.589245 |
| 126 | 1 | 0 | 12.399957 | 12.547095  | -6.757018 |
| 127 | 1 | 0 | 13.949122 | 12.064063  | -6.086094 |
| 128 | 6 | 0 | 19.779346 | -12.590288 | -2.786825 |
| 129 | 1 | 0 | 19.482828 | -10.641217 | -3.676694 |
| 130 | 1 | 0 | 18.343859 | -11.858075 | -4.229689 |
| 131 | 6 | 0 | 21.086517 | 2.315457   | 8.898666  |
| 132 | 1 | 0 | 19.435894 | 0.998282   | 9.364956  |
| 133 | 1 | 0 | 19.022495 | 2.704227   | 9.414630  |
| 134 | 1 | 0 | 14.023998 | 14.189233  | -4.714487 |
| 135 | 1 | 0 | 12.464709 | 14.676261  | -5.393895 |
| 136 | 1 | 0 | 13.884012 | 14.542209  | -6.443838 |
| 137 | 1 | 0 | 19.196490 | -13.464156 | -2.470294 |
| 138 | 1 | 0 | 20.345066 | -12.238342 | -1.915227 |
| 139 | 1 | 0 | 20.502078 | -12.926906 | -3.538956 |
| 140 | 1 | 0 | 21.275944 | 3.287222   | 8.425991  |
| 141 | 1 | 0 | 21.691845 | 1.568415   | 8.370392  |
| 142 | 1 | 0 | 21.452279 | 2.370735   | 9.930424  |
| 143 | 6 | 0 | -4.976302 | -1.662710  | -0.136623 |
| 144 | 6 | 0 | -6.000648 | -2.626711  | -0.185874 |
| 145 | 6 | 0 | -5.308262 | -0.308596  | 0.054303  |
| 146 | 6 | 0 | -7.329203 | -2.244372  | -0.021691 |
| 147 | 1 | 0 | -5.768567 | -3.675539  | -0.333319 |
| 148 | 6 | 0 | -6.637534 | 0.072749   | 0.224135  |
| 149 | 1 | 0 | -4.535254 | 0.450856   | 0.095075  |
| 150 | 6 | 0 | -7.660427 | -0.893395  | 0.195617  |
| 151 | 8 | 0 | -8.302172 | -3.214026  | 0.003838  |
| 152 | 8 | 0 | -6.917722 | 1.388829   | 0.494291  |
| 153 | 8 | 0 | -8.969157 | -0.513296  | 0.372353  |
| 154 | 6 | 0 | -9.185808 | -3.244175  | -1.134944 |

|     |   |   |            |           |           |
|-----|---|---|------------|-----------|-----------|
| 155 | 6 | 0 | -7.623270  | 2.105487  | -0.537597 |
| 156 | 6 | 0 | -9.463799  | -0.710105 | 1.715634  |
| 157 | 1 | 0 | -9.688531  | -2.275508 | -1.237169 |
| 158 | 1 | 0 | -8.592484  | -3.424429 | -2.043089 |
| 159 | 6 | 0 | -10.189566 | -4.365092 | -0.910318 |
| 160 | 1 | 0 | -7.029910  | 2.075741  | -1.463370 |
| 161 | 1 | 0 | -8.587374  | 1.621737  | -0.729408 |
| 162 | 6 | 0 | -7.811733  | 3.538560  | -0.062598 |
| 163 | 1 | 0 | -9.361751  | -1.769099 | 1.982657  |
| 164 | 1 | 0 | -8.855061  | -0.114941 | 2.409484  |
| 165 | 6 | 0 | -10.920357 | -0.274665 | 1.755492  |
| 166 | 6 | 0 | -11.188107 | -4.508398 | -2.066447 |
| 167 | 1 | 0 | -10.727568 | -4.169911 | 0.026875  |
| 168 | 1 | 0 | -9.641202  | -5.305096 | -0.766521 |
| 169 | 6 | 0 | -8.534055  | 4.410253  | -1.097995 |
| 170 | 1 | 0 | -6.827126  | 3.965617  | 0.168887  |
| 171 | 1 | 0 | -8.376980  | 3.524657  | 0.878649  |
| 172 | 6 | 0 | -11.546309 | -0.465648 | 3.143576  |
| 173 | 1 | 0 | -11.481712 | -0.851978 | 1.008923  |
| 174 | 1 | 0 | -10.985528 | 0.778969  | 1.453589  |
| 175 | 6 | 0 | -12.209124 | -5.630871 | -1.838729 |
| 176 | 1 | 0 | -11.721094 | -3.557144 | -2.211490 |
| 177 | 1 | 0 | -10.642989 | -4.698234 | -3.002662 |
| 178 | 6 | 0 | -8.724721  | 5.861651  | -0.638101 |
| 179 | 1 | 0 | -7.969233  | 4.402155  | -2.041924 |
| 180 | 1 | 0 | -9.515804  | 3.970499  | -1.327393 |
| 181 | 6 | 0 | -13.021882 | -0.049673 | 3.204610  |
| 182 | 1 | 0 | -11.455722 | -1.520219 | 3.442430  |
| 183 | 1 | 0 | -10.975870 | 0.111186  | 3.886190  |
| 184 | 6 | 0 | -13.224564 | -5.778403 | -2.979147 |
| 185 | 1 | 0 | -11.675701 | -6.582744 | -1.700829 |
| 186 | 1 | 0 | -12.746032 | -5.445172 | -0.896762 |
| 187 | 6 | 0 | -9.441740  | 6.740031  | -1.671281 |
| 188 | 1 | 0 | -9.290755  | 5.872245  | 0.305002  |
| 189 | 1 | 0 | -7.742551  | 6.299837  | -0.407225 |
| 190 | 6 | 0 | -13.655501 | -0.256532 | 4.586387  |
| 191 | 1 | 0 | -13.113937 | 1.007576  | 2.915336  |
| 192 | 1 | 0 | -13.590144 | -0.620145 | 2.455168  |
| 193 | 6 | 0 | -14.245157 | -6.899615 | -2.744656 |
| 194 | 1 | 0 | -13.756919 | -4.825431 | -3.116815 |
| 195 | 1 | 0 | -12.688973 | -5.965346 | -3.921727 |
| 196 | 6 | 0 | -9.623695  | 8.194642  | -1.218665 |
| 197 | 1 | 0 | -8.877881  | 6.722272  | -2.615866 |
| 198 | 1 | 0 | -10.426107 | 6.304187  | -1.898230 |
| 199 | 6 | 0 | -15.133605 | 0.149186  | 4.650166  |
| 200 | 1 | 0 | -13.557037 | -1.313546 | 4.875102  |
| 201 | 1 | 0 | -13.088661 | 0.315932  | 5.335584  |
| 202 | 6 | 0 | -15.269968 | -7.045227 | -3.877107 |
| 203 | 1 | 0 | -14.774903 | -6.715093 | -1.798158 |
| 204 | 1 | 0 | -13.712601 | -7.853084 | -2.612176 |
| 205 | 6 | 0 | -10.335730 | 9.074076  | -2.254649 |
| 206 | 1 | 0 | -8.639031  | 8.628843  | -0.989716 |
| 207 | 1 | 0 | -10.189502 | 8.213709  | -0.275283 |
| 208 | 6 | 0 | -15.768969 | -0.068898 | 6.029592  |

|     |   |   |            |            |           |
|-----|---|---|------------|------------|-----------|
| 209 | 1 | 0 | -15.698639 | -0.419541  | 3.896641  |
| 210 | 1 | 0 | -15.232646 | 1.207811   | 4.367399  |
| 211 | 6 | 0 | -16.290470 | -8.165570  | -3.638137 |
| 212 | 1 | 0 | -15.802188 | -6.091434  | -4.009640 |
| 213 | 1 | 0 | -14.741482 | -7.231044  | -4.823989 |
| 214 | 6 | 0 | -10.511460 | 10.530811  | -1.806470 |
| 215 | 1 | 0 | -9.771366  | 9.050889   | -3.198844 |
| 216 | 1 | 0 | -11.322000 | 8.642260   | -2.481199 |
| 217 | 6 | 0 | -17.248558 | 0.331263   | 6.093900  |
| 218 | 1 | 0 | -15.666977 | -1.127280  | 6.312207  |
| 219 | 1 | 0 | -15.205370 | 0.501029   | 6.783250  |
| 220 | 6 | 0 | -17.319922 | -8.310046  | -4.766501 |
| 221 | 1 | 0 | -15.758226 | -9.119631  | -3.508230 |
| 222 | 1 | 0 | -16.815997 | -7.980906  | -2.689305 |
| 223 | 6 | 0 | -11.218454 | 11.411045  | -2.845232 |
| 224 | 1 | 0 | -11.078182 | 10.555012  | -0.863730 |
| 225 | 1 | 0 | -9.525091  | 10.961194  | -1.577525 |
| 226 | 6 | 0 | -17.884956 | 0.106945   | 7.471843  |
| 227 | 1 | 0 | -17.350829 | 1.390537   | 5.814629  |
| 228 | 1 | 0 | -17.811117 | -0.236565  | 5.337823  |
| 229 | 1 | 0 | -17.851754 | -7.355692  | -4.896779 |
| 230 | 1 | 0 | -16.794951 | -8.495794  | -5.715421 |
| 231 | 6 | 0 | -18.340767 | -9.429405  | -4.525434 |
| 232 | 1 | 0 | -10.652301 | 11.384602  | -3.788310 |
| 233 | 1 | 0 | -12.205708 | 10.982063  | -3.073091 |
| 234 | 6 | 0 | -11.390728 | 12.868865  | -2.399839 |
| 235 | 1 | 0 | -17.781451 | -0.952269  | 7.750959  |
| 236 | 1 | 0 | -17.323076 | 0.675251   | 8.228084  |
| 237 | 6 | 0 | -19.365066 | 0.504513   | 7.536423  |
| 238 | 6 | 0 | -19.371352 | -9.574696  | -5.652585 |
| 239 | 1 | 0 | -18.866145 | -9.244250  | -3.576441 |
| 240 | 1 | 0 | -17.809718 | -10.384326 | -4.395520 |
| 241 | 6 | 0 | -12.093355 | 13.750371  | -3.440404 |
| 242 | 1 | 0 | -10.403819 | 13.297769  | -2.169746 |
| 243 | 1 | 0 | -11.959439 | 12.896990  | -1.458235 |
| 244 | 6 | 0 | -20.002667 | 0.277513   | 8.913314  |
| 245 | 1 | 0 | -19.927380 | -0.062617  | 6.779428  |
| 246 | 1 | 0 | -19.469603 | 1.564330   | 7.259414  |
| 247 | 6 | 0 | -20.387355 | -10.693913 | -5.402613 |
| 248 | 1 | 0 | -18.846825 | -9.761388  | -6.600551 |
| 249 | 1 | 0 | -19.902111 | -8.620726  | -5.782643 |
| 250 | 6 | 0 | -12.259882 | 15.204708  | -2.988051 |
| 251 | 1 | 0 | -13.079949 | 13.323030  | -3.669897 |
| 252 | 1 | 0 | -11.524822 | 13.722500  | -4.380984 |
| 253 | 6 | 0 | -21.480711 | 0.677060   | 8.968436  |
| 254 | 1 | 0 | -19.441482 | 0.844476   | 9.669807  |
| 255 | 1 | 0 | -19.899150 | -0.781468  | 9.189667  |
| 256 | 1 | 0 | -20.953292 | -10.516540 | -4.479671 |
| 257 | 1 | 0 | -19.889231 | -11.666178 | -5.301999 |
| 258 | 1 | 0 | -21.107798 | -10.772574 | -6.224872 |
| 259 | 1 | 0 | -11.287573 | 15.669871  | -2.783512 |
| 260 | 1 | 0 | -12.855506 | 15.268399  | -2.068960 |
| 261 | 1 | 0 | -12.762845 | 15.807591  | -3.752843 |
| 262 | 1 | 0 | -22.074121 | 0.100681   | 8.247851  |



|     |   |   |            |          |          |
|-----|---|---|------------|----------|----------|
| 263 | 1 | 0 | -21.613129 | 1.739543 | 8.729183 |
| 264 | 1 | 0 | -21.906237 | 0.504389 | 9.963633 |

-----  
**Compound 2**  
-----

| Center<br>Number | Atomic<br>Number | Atomic<br>Type | Coordinates (Angstroms) |           |           |
|------------------|------------------|----------------|-------------------------|-----------|-----------|
|                  |                  |                | X                       | Y         | Z         |
| 1                | 6                | 0              | -1.046534               | -3.141618 | -0.385472 |
| 2                | 6                | 0              | 1.135334                | -3.081498 | -0.464968 |
| 3                | 7                | 0              | 0.025485                | -2.268057 | -0.310387 |
| 4                | 7                | 0              | -0.605962               | -4.381639 | -0.577294 |
| 5                | 7                | 0              | 0.750688                | -4.344796 | -0.623077 |
| 6                | 6                | 0              | -0.005891               | -0.855020 | -0.113217 |
| 7                | 6                | 0              | -0.684407               | -0.317476 | 0.983496  |
| 8                | 6                | 0              | 0.641452                | -0.009891 | -1.018209 |
| 9                | 6                | 0              | -0.717829               | 1.062082  | 1.165274  |
| 10               | 1                | 0              | -1.186076               | -0.976603 | 1.683841  |
| 11               | 6                | 0              | 0.613330                | 1.367115  | -0.817462 |
| 12               | 1                | 0              | 1.166163                | -0.431373 | -1.869067 |
| 13               | 6                | 0              | -0.068211               | 1.932533  | 0.273661  |
| 14               | 1                | 0              | -1.270416               | 1.470501  | 2.006090  |
| 15               | 1                | 0              | 1.142030                | 2.013478  | -1.511734 |
| 16               | 6                | 0              | 2.468054                | -2.627284 | -0.407622 |
| 17               | 6                | 0              | 3.627305                | -2.266196 | -0.347058 |
| 18               | 6                | 0              | -2.396566               | -2.750306 | -0.288535 |
| 19               | 6                | 0              | -3.566337               | -2.434554 | -0.189247 |
| 20               | 6                | 0              | 4.989400                | -1.864806 | -0.253970 |
| 21               | 6                | 0              | 5.341735                | -0.503876 | -0.317656 |
| 22               | 6                | 0              | 5.996535                | -2.834454 | -0.091914 |
| 23               | 6                | 0              | 6.674971                | -0.117705 | -0.197361 |
| 24               | 1                | 0              | 4.582050                | 0.261112  | -0.434512 |
| 25               | 6                | 0              | 7.328415                | -2.447591 | 0.029595  |
| 26               | 1                | 0              | 5.746611                | -3.887964 | -0.034574 |
| 27               | 6                | 0              | 7.680561                | -1.086000 | -0.018674 |
| 28               | 8                | 0              | 6.979765                | 1.220697  | -0.174488 |
| 29               | 8                | 0              | 8.278014                | -3.405758 | 0.285551  |
| 30               | 8                | 0              | 8.993610                | -0.701066 | 0.109125  |
| 31               | 6                | 0              | 7.696736                | 1.720721  | -1.319544 |
| 32               | 6                | 0              | 9.193903                | -3.696477 | -0.788743 |
| 33               | 6                | 0              | 9.431365                | -0.563375 | 1.479032  |
| 34               | 1                | 0              | 8.622696                | 1.150468  | -1.453521 |
| 35               | 1                | 0              | 7.074536                | 1.588271  | -2.217210 |
| 36               | 6                | 0              | 7.990690                | 3.193455  | -1.076083 |
| 37               | 1                | 0              | 8.622992                | -4.039264 | -1.663956 |
| 38               | 1                | 0              | 9.739623                | -2.787195 | -1.066378 |
| 39               | 6                | 0              | 10.138285               | -4.782562 | -0.295723 |
| 40               | 1                | 0              | 8.817749                | 0.201782  | 1.972770  |
| 41               | 1                | 0              | 9.282859                | -1.518482 | 1.998196  |
| 42               | 6                | 0              | 10.900044               | -0.168361 | 1.474991  |
| 43               | 6                | 0              | 8.712142                | 3.854032  | -2.257947 |
| 44               | 1                | 0              | 8.598381                | 3.282424  | -0.165887 |
| 45               | 1                | 0              | 7.044909                | 3.712916  | -0.873640 |

|    |   |   |           |           |           |
|----|---|---|-----------|-----------|-----------|
| 46 | 6 | 0 | 11.154511 | -5.227489 | -1.355626 |
| 47 | 1 | 0 | 9.538642  | -5.641495 | 0.032596  |
| 48 | 1 | 0 | 10.663889 | -4.410669 | 0.593865  |
| 49 | 6 | 0 | 11.463062 | -0.018756 | 2.894544  |
| 50 | 1 | 0 | 11.014947 | 0.773089  | 0.921753  |
| 51 | 1 | 0 | 11.468432 | -0.929501 | 0.924203  |
| 52 | 6 | 0 | 9.035107  | 5.334304  | -2.015314 |
| 53 | 1 | 0 | 9.644418  | 3.310273  | -2.470444 |
| 54 | 1 | 0 | 8.093521  | 3.762140  | -3.162850 |
| 55 | 6 | 0 | 12.098432 | -6.323425 | -0.843432 |
| 56 | 1 | 0 | 10.622355 | -5.593197 | -2.245979 |
| 57 | 1 | 0 | 11.747018 | -4.362250 | -1.687657 |
| 58 | 6 | 0 | 12.948770 | 0.364238  | 2.922516  |
| 59 | 1 | 0 | 10.883215 | 0.739302  | 3.441098  |
| 60 | 1 | 0 | 11.323248 | -0.961976 | 3.442630  |
| 61 | 6 | 0 | 9.744276  | 6.007233  | -3.197463 |
| 62 | 1 | 0 | 8.104329  | 5.876564  | -1.792831 |
| 63 | 1 | 0 | 9.661183  | 5.425116  | -1.115466 |
| 64 | 6 | 0 | 13.122715 | -6.796523 | -1.882896 |
| 65 | 1 | 0 | 12.629044 | -5.955271 | 0.047072  |
| 66 | 1 | 0 | 11.501308 | -7.183107 | -0.505607 |
| 67 | 6 | 0 | 13.514338 | 0.493085  | 4.342523  |
| 68 | 1 | 0 | 13.527481 | -0.388615 | 2.367285  |
| 69 | 1 | 0 | 13.090545 | 1.313512  | 2.385218  |
| 70 | 6 | 0 | 10.075493 | 7.484972  | -2.951769 |
| 71 | 1 | 0 | 10.671569 | 5.460252  | -3.424191 |
| 72 | 1 | 0 | 9.114620  | 5.920689  | -4.095521 |
| 73 | 6 | 0 | 14.055974 | -7.893680 | -1.354575 |
| 74 | 1 | 0 | 12.593570 | -7.166317 | -2.773682 |
| 75 | 1 | 0 | 13.723289 | -5.938815 | -2.220709 |
| 76 | 6 | 0 | 15.001987 | 0.866632  | 4.381697  |
| 77 | 1 | 0 | 12.935958 | 1.247080  | 4.896857  |
| 78 | 1 | 0 | 13.365131 | -0.456325 | 4.878008  |
| 79 | 6 | 0 | 10.779581 | 8.160702  | -4.135591 |
| 80 | 1 | 0 | 10.708396 | 7.570586  | -2.055894 |
| 81 | 1 | 0 | 9.148839  | 8.031200  | -2.720657 |
| 82 | 6 | 0 | 15.084639 | -8.380000 | -2.383764 |
| 83 | 1 | 0 | 13.452567 | -8.748226 | -1.014012 |
| 84 | 1 | 0 | 14.583222 | -7.522002 | -0.463281 |
| 85 | 6 | 0 | 15.564824 | 0.980181  | 5.804256  |
| 86 | 1 | 0 | 15.152252 | 1.820147  | 3.853758  |
| 87 | 1 | 0 | 15.579440 | 0.116044  | 3.821673  |
| 88 | 6 | 0 | 11.115405 | 9.637074  | -3.888084 |
| 89 | 1 | 0 | 11.704467 | 7.612372  | -4.368918 |
| 90 | 1 | 0 | 10.145043 | 8.077878  | -5.030597 |
| 91 | 6 | 0 | 16.012162 | -9.476932 | -1.844934 |
| 92 | 1 | 0 | 14.558755 | -8.753763 | -3.274899 |
| 93 | 1 | 0 | 15.690023 | -7.526911 | -2.724744 |
| 94 | 6 | 0 | 17.053735 | 1.347756  | 5.850127  |
| 95 | 1 | 0 | 14.988143 | 1.731587  | 6.363968  |
| 96 | 1 | 0 | 15.410520 | 0.026725  | 6.331181  |
| 97 | 6 | 0 | 11.818245 | 10.313245 | -5.072400 |
| 98 | 1 | 0 | 10.190811 | 10.185362 | -3.653475 |
| 99 | 1 | 0 | 11.750932 | 9.719468  | -2.993733 |

|     |   |   |           |            |           |
|-----|---|---|-----------|------------|-----------|
| 100 | 6 | 0 | 17.042965 | -9.970728  | -2.868374 |
| 101 | 1 | 0 | 16.537161 | -9.101898  | -0.953715 |
| 102 | 1 | 0 | 15.405260 | -10.328170 | -1.502174 |
| 103 | 6 | 0 | 17.614346 | 1.451775   | 7.274288  |
| 104 | 1 | 0 | 17.629937 | 0.598452   | 5.287065  |
| 105 | 1 | 0 | 17.208751 | 2.303728   | 5.327946  |
| 106 | 1 | 0 | 12.741992 | 9.763822   | -5.307846 |
| 107 | 1 | 0 | 11.182065 | 10.232102  | -5.966445 |
| 108 | 6 | 0 | 12.156681 | 11.788800  | -4.824691 |
| 109 | 1 | 0 | 16.518645 | -10.347471 | -3.759251 |
| 110 | 1 | 0 | 17.650600 | -9.120189  | -3.211823 |
| 111 | 6 | 0 | 17.967971 | -11.066786 | -2.323873 |
| 112 | 1 | 0 | 17.038617 | 2.201616   | 7.837170  |
| 113 | 1 | 0 | 17.456980 | 0.495839   | 7.795900  |
| 114 | 6 | 0 | 19.103813 | 1.815730   | 7.324409  |
| 115 | 6 | 0 | 12.861012 | 12.464510  | -6.008306 |
| 116 | 1 | 0 | 12.792708 | 11.870934  | -3.930499 |
| 117 | 1 | 0 | 11.233353 | 12.339624  | -4.590332 |
| 118 | 6 | 0 | 18.999242 | -11.565252 | -3.344478 |
| 119 | 1 | 0 | 17.360348 | -11.916832 | -1.978921 |
| 120 | 1 | 0 | 18.493223 | -10.689838 | -1.433464 |
| 121 | 6 | 0 | 19.663605 | 1.914738   | 8.749183  |
| 122 | 1 | 0 | 19.262576 | 2.773243   | 6.805831  |
| 123 | 1 | 0 | 19.680337 | 1.067242   | 6.760320  |
| 124 | 6 | 0 | 13.196360 | 13.937388  | -5.752390 |
| 125 | 1 | 0 | 12.225532 | 12.383641  | -6.901797 |
| 126 | 1 | 0 | 13.783629 | 11.914196  | -6.242003 |
| 127 | 6 | 0 | 19.918034 | -12.658774 | -2.789864 |
| 128 | 1 | 0 | 19.606897 | -10.716410 | -3.689323 |
| 129 | 1 | 0 | 18.474753 | -11.943562 | -4.233521 |
| 130 | 6 | 0 | 21.151806 | 2.276463   | 8.791589  |
| 131 | 1 | 0 | 19.504797 | 0.958093   | 9.267222  |
| 132 | 1 | 0 | 19.088732 | 2.663502   | 9.312684  |
| 133 | 1 | 0 | 13.858158 | 14.048252  | -4.884449 |
| 134 | 1 | 0 | 12.289583 | 14.521524  | -5.552094 |
| 135 | 1 | 0 | 13.699801 | 14.389786  | -6.614514 |
| 136 | 1 | 0 | 19.341539 | -13.534748 | -2.467569 |
| 137 | 1 | 0 | 20.483159 | -12.298528 | -1.921280 |
| 138 | 1 | 0 | 20.641444 | -12.994583 | -3.541704 |
| 139 | 1 | 0 | 21.338208 | 3.247078   | 8.315365  |
| 140 | 1 | 0 | 21.756702 | 1.528782   | 8.263720  |
| 141 | 1 | 0 | 21.520698 | 2.335501   | 9.822026  |
| 142 | 6 | 0 | -4.934768 | -2.065611  | -0.064464 |
| 143 | 6 | 0 | -5.937568 | -3.053219  | -0.071757 |
| 144 | 6 | 0 | -5.295744 | -0.711323  | 0.066572  |
| 145 | 6 | 0 | -7.275339 | -2.694836  | 0.076099  |
| 146 | 1 | 0 | -5.681471 | -4.102037  | -0.172043 |
| 147 | 6 | 0 | -6.633645 | -0.354118  | 0.213851  |
| 148 | 1 | 0 | -4.539763 | 0.066166   | 0.072788  |
| 149 | 6 | 0 | -7.634929 | -1.342676  | 0.227998  |
| 150 | 8 | 0 | -8.225906 | -3.682874  | 0.144684  |
| 151 | 8 | 0 | -6.954022 | 0.966431   | 0.415965  |
| 152 | 8 | 0 | -8.954402 | -0.990944  | 0.382888  |
| 153 | 6 | 0 | -9.115476 | -3.769825  | -0.986215 |

|     |   |   |            |           |           |
|-----|---|---|------------|-----------|-----------|
| 154 | 6 | 0 | -7.627237  | 1.613256  | -0.682079 |
| 155 | 6 | 0 | -9.386400  | -0.935188 | 1.759784  |
| 156 | 1 | 0 | -9.635893  | -2.814586 | -1.118936 |
| 157 | 1 | 0 | -8.523968  | -3.971322 | -1.891274 |
| 158 | 6 | 0 | -10.101384 | -4.897789 | -0.721293 |
| 159 | 1 | 0 | -6.974940  | 1.585079  | -1.567302 |
| 160 | 1 | 0 | -8.551137  | 1.072792  | -0.917531 |
| 161 | 6 | 0 | -7.921538  | 3.048501  | -0.272439 |
| 162 | 1 | 0 | -9.216199  | -1.914318 | 2.226079  |
| 163 | 1 | 0 | -8.785473  | -0.185778 | 2.291136  |
| 164 | 6 | 0 | -10.862395 | -0.569654 | 1.782556  |
| 165 | 6 | 0 | -11.104769 | -5.077540 | -1.867965 |
| 166 | 1 | 0 | -10.634581 | -4.683771 | 0.214431  |
| 167 | 1 | 0 | -9.541488  | -5.827797 | -0.558297 |
| 168 | 6 | 0 | -8.638176  | 3.835507  | -1.377518 |
| 169 | 1 | 0 | -6.977447  | 3.542132  | -0.007449 |
| 170 | 1 | 0 | -8.535282  | 3.034302  | 0.637945  |
| 171 | 6 | 0 | -11.418951 | -0.486623 | 3.209975  |
| 172 | 1 | 0 | -11.420372 | -1.317916 | 1.204314  |
| 173 | 1 | 0 | -10.997577 | 0.391367  | 1.268745  |
| 174 | 6 | 0 | -12.114759 | -6.205153 | -1.617184 |
| 175 | 1 | 0 | -11.647995 | -4.134675 | -2.029019 |
| 176 | 1 | 0 | -10.562026 | -5.279473 | -2.803111 |
| 177 | 6 | 0 | -8.940570  | 5.288768  | -0.989050 |
| 178 | 1 | 0 | -8.025454  | 3.826096  | -2.291026 |
| 179 | 1 | 0 | -9.578457  | 3.327228  | -1.637116 |
| 180 | 6 | 0 | -12.910078 | -0.128010 | 3.259383  |
| 181 | 1 | 0 | -11.261449 | -1.448390 | 3.719807  |
| 182 | 1 | 0 | -10.848121 | 0.258631  | 3.783010  |
| 183 | 6 | 0 | -13.133943 | -6.373120 | -2.751338 |
| 184 | 1 | 0 | -11.573594 | -7.151187 | -1.469741 |
| 185 | 1 | 0 | -12.648277 | -6.010645 | -0.675099 |
| 186 | 6 | 0 | -9.671572  | 6.071592  | -2.087358 |
| 187 | 1 | 0 | -9.544743  | 5.300805  | -0.069919 |
| 188 | 1 | 0 | -7.999583  | 5.801091  | -0.740435 |
| 189 | 6 | 0 | -13.469294 | -0.048910 | 4.685533  |
| 190 | 1 | 0 | -13.069314 | 0.834719  | 2.751535  |
| 191 | 1 | 0 | -13.480970 | -0.872418 | 2.685062  |
| 192 | 6 | 0 | -14.147144 | -7.498303 | -2.503827 |
| 193 | 1 | 0 | -13.673037 | -5.425089 | -2.896802 |
| 194 | 1 | 0 | -12.600441 | -6.565702 | -3.694002 |
| 195 | 6 | 0 | -9.970946  | 7.528047  | -1.709400 |
| 196 | 1 | 0 | -9.070008  | 6.052253  | -3.008345 |
| 197 | 1 | 0 | -10.614087 | 5.559025  | -2.331039 |
| 198 | 6 | 0 | -14.961170 | 0.304718  | 4.741636  |
| 199 | 1 | 0 | -13.305350 | -1.011388 | 5.192680  |
| 200 | 1 | 0 | -12.897897 | 0.696325  | 5.258661  |
| 201 | 6 | 0 | -15.174886 | -7.655537 | -3.632004 |
| 202 | 1 | 0 | -14.674341 | -7.309914 | -1.556681 |
| 203 | 1 | 0 | -13.609299 | -8.448178 | -2.367074 |
| 204 | 6 | 0 | -10.711096 | 8.303883  | -2.806762 |
| 205 | 1 | 0 | -9.028085  | 8.043208  | -1.472751 |
| 206 | 1 | 0 | -10.567290 | 7.548523  | -0.785042 |
| 207 | 6 | 0 | -15.518236 | 0.380972  | 6.168967  |

|     |   |   |            |            |           |
|-----|---|---|------------|------------|-----------|
| 208 | 1 | 0 | -15.532514 | -0.440243  | 4.168030  |
| 209 | 1 | 0 | -15.125776 | 1.267752   | 4.235583  |
| 210 | 6 | 0 | -16.190087 | -8.779095  | -3.385433 |
| 211 | 1 | 0 | -15.711777 | -6.704835  | -3.767930 |
| 212 | 1 | 0 | -14.648237 | -7.843605  | -4.579483 |
| 213 | 6 | 0 | -11.009104 | 9.762251   | -2.435195 |
| 214 | 1 | 0 | -10.116398 | 8.279601   | -3.732120 |
| 215 | 1 | 0 | -11.654879 | 7.788996   | -3.040548 |
| 216 | 6 | 0 | -17.010504 | 0.732331   | 6.228363  |
| 217 | 1 | 0 | -15.351794 | -0.581848  | 6.674786  |
| 218 | 1 | 0 | -14.946958 | 1.126354   | 6.742126  |
| 219 | 6 | 0 | -17.221960 | -8.930679  | -4.510608 |
| 220 | 1 | 0 | -15.653937 | -9.730734  | -3.253888 |
| 221 | 1 | 0 | -16.713601 | -8.593076  | -2.435760 |
| 222 | 6 | 0 | -11.754455 | 10.533295  | -3.532411 |
| 223 | 1 | 0 | -11.600973 | 9.787258   | -1.508048 |
| 224 | 1 | 0 | -10.065222 | 10.278774  | -2.205488 |
| 225 | 6 | 0 | -17.565946 | 0.807554   | 7.656381  |
| 226 | 1 | 0 | -17.177322 | 1.695328   | 5.722910  |
| 227 | 1 | 0 | -17.581866 | -0.013077  | 5.655307  |
| 228 | 1 | 0 | -17.757362 | -7.978490  | -4.642139 |
| 229 | 1 | 0 | -16.698655 | -9.117061  | -5.460332 |
| 230 | 6 | 0 | -18.238574 | -10.052827 | -4.264518 |
| 231 | 1 | 0 | -11.163464 | 10.506217  | -4.460108 |
| 232 | 1 | 0 | -12.698803 | 10.016828  | -3.760532 |
| 233 | 6 | 0 | -12.052113 | 11.992576  | -3.164860 |
| 234 | 1 | 0 | -17.398369 | -0.155374  | 8.161734  |
| 235 | 1 | 0 | -16.994488 | 1.553118   | 8.229217  |
| 236 | 6 | 0 | -19.058167 | 1.158005   | 7.717804  |
| 237 | 6 | 0 | -19.271375 | -10.203359 | -5.388918 |
| 238 | 1 | 0 | -18.762208 | -9.867420  | -3.314612 |
| 239 | 1 | 0 | -17.704275 | -11.005858 | -4.134079 |
| 240 | 6 | 0 | -12.800673 | 12.761266  | -4.261482 |
| 241 | 1 | 0 | -11.108090 | 12.511034  | -2.939374 |
| 242 | 1 | 0 | -12.641770 | 12.021006  | -2.236225 |
| 243 | 6 | 0 | -19.613121 | 1.233306   | 9.145935  |
| 244 | 1 | 0 | -19.630758 | 0.412490   | 7.145838  |
| 245 | 1 | 0 | -19.226942 | 2.121122   | 7.212870  |
| 246 | 6 | 0 | -20.283410 | -11.325218 | -5.134671 |
| 247 | 1 | 0 | -18.748498 | -10.390089 | -6.337790 |
| 248 | 1 | 0 | -19.805335 | -9.251236  | -5.519392 |
| 249 | 6 | 0 | -13.093833 | 14.217773  | -3.887445 |
| 250 | 1 | 0 | -13.744310 | 12.243712  | -4.485795 |
| 251 | 1 | 0 | -12.211697 | 12.733018  | -5.189385 |
| 252 | 6 | 0 | -21.103770 | 1.583324   | 9.198649  |
| 253 | 1 | 0 | -19.041754 | 1.978770   | 9.717331  |
| 254 | 1 | 0 | -19.445271 | 0.271039   | 9.650545  |
| 255 | 1 | 0 | -20.847713 | -11.147995 | -4.210696 |
| 256 | 1 | 0 | -19.782151 | -12.295826 | -5.033593 |
| 257 | 1 | 0 | -21.005562 | -11.407455 | -5.955088 |
| 258 | 1 | 0 | -12.166932 | 14.771442  | -3.692797 |
| 259 | 1 | 0 | -13.710112 | 14.278291  | -2.981844 |
| 260 | 1 | 0 | -13.629677 | 14.737827  | -4.689806 |
| 261 | 1 | 0 | -21.705210 | 0.838008   | 8.663552  |

|     |   |   |            |          |           |
|-----|---|---|------------|----------|-----------|
| 262 | 1 | 0 | -21.299020 | 2.558533 | 8.735520  |
| 263 | 1 | 0 | -21.469070 | 1.626487 | 10.231145 |
| 264 | 6 | 0 | -0.100521  | 3.402934 | 0.478009  |
| 265 | 6 | 0 | -0.021855  | 3.953833 | 1.768225  |
| 266 | 6 | 0 | -0.209891  | 4.280739 | -0.613784 |
| 267 | 6 | 0 | -0.051693  | 5.334155 | 1.960240  |
| 268 | 1 | 0 | 0.091251   | 3.295143 | 2.624765  |
| 269 | 6 | 0 | -0.239696  | 5.661116 | -0.422034 |
| 270 | 1 | 0 | -0.299094  | 3.876063 | -1.618194 |
| 271 | 6 | 0 | -0.160751  | 6.194065 | 0.865885  |
| 272 | 1 | 0 | 0.019389   | 5.738319 | 2.966550  |
| 273 | 1 | 0 | -0.333267  | 6.321143 | -1.280423 |
| 274 | 1 | 0 | -0.183842  | 7.270062 | 1.015349  |

---

## Monomer

---

| Center Number | Atomic Number | Atomic Type | Coordinates (Angstroms) |           |           |
|---------------|---------------|-------------|-------------------------|-----------|-----------|
|               |               |             | X                       | Y         | Z         |
| 1             | 6             | 0           | 1.079475                | -1.808822 | -0.079527 |
| 2             | 6             | 0           | -1.082065               | -1.806965 | -0.088491 |
| 3             | 7             | 0           | -0.000785               | -0.963225 | -0.082209 |
| 4             | 7             | 0           | -0.673393               | -3.061277 | -0.095829 |
| 5             | 6             | 0           | 2.417753                | -1.380851 | -0.034559 |
| 6             | 6             | 0           | -2.421551               | -1.380899 | -0.108821 |
| 7             | 6             | 0           | 3.577209                | -1.035324 | 0.008877  |
| 8             | 6             | 0           | -3.577003               | -1.019410 | -0.115542 |
| 9             | 6             | 0           | 4.936571                | -0.633971 | 0.053088  |
| 10            | 6             | 0           | 5.273604                | 0.722820  | 0.010211  |
| 11            | 6             | 0           | 5.945746                | -1.599532 | 0.125018  |
| 12            | 6             | 0           | 6.602913                | 1.103821  | 0.052471  |
| 13            | 1             | 0           | 4.508161                | 1.484617  | -0.044950 |
| 14            | 6             | 0           | 7.274601                | -1.213914 | 0.175941  |
| 15            | 1             | 0           | 5.703921                | -2.652301 | 0.165357  |
| 16            | 6             | 0           | 7.614044                | 0.141859  | 0.141964  |
| 17            | 6             | 0           | -4.938500               | -0.622592 | -0.098644 |
| 18            | 6             | 0           | -5.943015               | -1.594979 | -0.103209 |
| 19            | 6             | 0           | -5.283882               | 0.731458  | -0.054587 |
| 20            | 6             | 0           | -7.275893               | -1.220134 | -0.091339 |
| 21            | 1             | 0           | -5.695930               | -2.646551 | -0.137938 |
| 22            | 6             | 0           | -6.616506               | 1.102778  | -0.029707 |
| 23            | 1             | 0           | -4.524714               | 1.500707  | -0.044385 |
| 24            | 6             | 0           | -7.624319               | 0.133784  | -0.062716 |
| 25            | 8             | 0           | 8.924587                | 0.510075  | 0.197952  |
| 26            | 8             | 0           | -8.939791               | 0.487307  | -0.061146 |
| 27            | 6             | 0           | 9.308722                | 1.041012  | 1.460385  |
| 28            | 1             | 0           | 9.194947                | 0.286492  | 2.241432  |
| 29            | 1             | 0           | 10.357406               | 1.316344  | 1.372484  |
| 30            | 1             | 0           | 8.714238                | 1.923044  | 1.704641  |
| 31            | 6             | 0           | -9.380288               | 1.062903  | -1.285000 |
| 32            | 1             | 0           | -9.277194               | 0.346090  | -2.101748 |

|    |   |   |            |           |           |
|----|---|---|------------|-----------|-----------|
| 33 | 1 | 0 | -10.431278 | 1.306740  | -1.148416 |
| 34 | 1 | 0 | -8.816385  | 1.968394  | -1.512472 |
| 35 | 7 | 0 | 0.668704   | -3.062240 | -0.086614 |
| 36 | 6 | 0 | 0.004941   | 0.453001  | -0.076630 |
| 37 | 6 | 0 | -0.793137  | 1.138940  | 0.830480  |
| 38 | 6 | 0 | 0.812247   | 1.138049  | -0.975879 |
| 39 | 6 | 0 | -0.783186  | 2.524996  | 0.830312  |
| 40 | 1 | 0 | -1.408821  | 0.585007  | 1.525777  |
| 41 | 6 | 0 | 0.824757   | 2.523907  | -0.955910 |
| 42 | 1 | 0 | 1.417598   | 0.584558  | -1.681696 |
| 43 | 6 | 0 | 0.027318   | 3.219447  | -0.056687 |
| 44 | 1 | 0 | -1.403038  | 3.062395  | 1.536753  |
| 45 | 1 | 0 | 1.452495   | 3.060796  | -1.654901 |
| 46 | 1 | 0 | 0.036860   | 4.301591  | -0.047739 |
| 47 | 8 | 0 | -6.935135  | 2.429576  | -0.033528 |
| 48 | 8 | 0 | -8.231394  | -2.182079 | -0.181374 |
| 49 | 8 | 0 | 6.915936   | 2.431882  | 0.071105  |
| 50 | 8 | 0 | 8.236300   | -2.162793 | 0.334315  |
| 51 | 6 | 0 | 9.105787   | -2.327221 | -0.775020 |
| 52 | 1 | 0 | 9.627091   | -1.400187 | -1.012653 |
| 53 | 1 | 0 | 9.828308   | -3.087648 | -0.486469 |
| 54 | 1 | 0 | 8.550869   | -2.673502 | -1.650825 |
| 55 | 6 | 0 | 7.562457   | 2.899433  | -1.102702 |
| 56 | 1 | 0 | 6.916121   | 2.773131  | -1.975670 |
| 57 | 1 | 0 | 7.750796   | 3.959808  | -0.947328 |
| 58 | 1 | 0 | 8.506160   | 2.378610  | -1.269276 |
| 59 | 6 | 0 | -9.058040  | -2.321926 | 0.962439  |
| 60 | 1 | 0 | -9.612840  | -1.405546 | 1.167057  |
| 61 | 1 | 0 | -9.753933  | -3.127409 | 0.737807  |
| 62 | 1 | 0 | -8.463634  | -2.596461 | 1.838491  |
| 63 | 6 | 0 | -7.553735  | 2.889882  | 1.158296  |
| 64 | 1 | 0 | -6.884534  | 2.762160  | 2.013396  |
| 65 | 1 | 0 | -7.749790  | 3.950063  | 1.011858  |
| 66 | 1 | 0 | -8.490748  | 2.365214  | 1.348331  |

---

### Dimer

---

| Center Number | Atomic Number | Atomic Type | Coordinates (Angstroms) |           |           |
|---------------|---------------|-------------|-------------------------|-----------|-----------|
|               |               |             | X                       | Y         | Z         |
| 1             | 6             | 0           | 0.106080                | -0.263228 | -1.637556 |
| 2             | 6             | 0           | -2.029982               | -0.506694 | -1.447213 |
| 3             | 7             | 0           | -0.852309               | -1.197920 | -1.350007 |
| 4             | 7             | 0           | -1.791756               | 0.747243  | -1.784763 |
| 5             | 6             | 0           | 1.487683                | -0.525519 | -1.674461 |
| 6             | 6             | 0           | -3.285604               | -1.054808 | -1.130025 |
| 7             | 6             | 0           | 2.679674                | -0.735520 | -1.716322 |
| 8             | 6             | 0           | -4.361594               | -1.511718 | -0.816791 |
| 9             | 6             | 0           | 4.073048                | -0.994322 | -1.793924 |
| 10            | 6             | 0           | 4.619499                | -2.099189 | -1.133637 |
| 11            | 6             | 0           | 4.901828                | -0.144095 | -2.529070 |
| 12            | 6             | 0           | 5.976156                | -2.346786 | -1.227147 |
| 13            | 1             | 0           | 3.996038                | -2.773509 | -0.564312 |
| 14            | 6             | 0           | 6.263109                | -0.396490 | -2.624393 |

|    |   |   |            |           |           |
|----|---|---|------------|-----------|-----------|
| 15 | 1 | 0 | 4.495335   | 0.708952  | -3.053843 |
| 16 | 6 | 0 | 6.808212   | -1.504282 | -1.970751 |
| 17 | 6 | 0 | -5.603843  | -2.061753 | -0.409082 |
| 18 | 6 | 0 | -6.790873  | -1.347579 | -0.594574 |
| 19 | 6 | 0 | -5.642016  | -3.324166 | 0.192201  |
| 20 | 6 | 0 | -7.993265  | -1.872261 | -0.149600 |
| 21 | 1 | 0 | -6.786459  | -0.372340 | -1.060231 |
| 22 | 6 | 0 | -6.846744  | -3.850834 | 0.620202  |
| 23 | 1 | 0 | -4.734675  | -3.894247 | 0.341034  |
| 24 | 6 | 0 | -8.030830  | -3.121891 | 0.473308  |
| 25 | 8 | 0 | 8.141139   | -1.786121 | -2.075928 |
| 26 | 8 | 0 | -9.218804  | -3.612416 | 0.928630  |
| 27 | 6 | 0 | 8.422860   | -2.762629 | -3.069600 |
| 28 | 1 | 0 | 8.127494   | -2.402335 | -4.057268 |
| 29 | 1 | 0 | 9.497726   | -2.924478 | -3.047429 |
| 30 | 1 | 0 | 7.907594   | -3.697917 | -2.845386 |
| 31 | 6 | 0 | -9.328501  | -3.609451 | 2.346150  |
| 32 | 1 | 0 | -9.295889  | -2.587427 | 2.729698  |
| 33 | 1 | 0 | -10.293481 | -4.052701 | 2.580909  |
| 34 | 1 | 0 | -8.529706  | -4.199219 | 2.797811  |
| 35 | 7 | 0 | -0.463347  | 0.898876  | -1.903773 |
| 36 | 6 | 0 | -0.678999  | -2.579295 | -1.072523 |
| 37 | 6 | 0 | -1.383278  | -3.511720 | -1.824135 |
| 38 | 6 | 0 | 0.186830   | -2.976549 | -0.064190 |
| 39 | 6 | 0 | -1.215760  | -4.861328 | -1.557823 |
| 40 | 1 | 0 | -2.048956  | -3.174072 | -2.607290 |
| 41 | 6 | 0 | 0.353191   | -4.330331 | 0.183414  |
| 42 | 1 | 0 | 0.696112   | -2.234270 | 0.534095  |
| 43 | 6 | 0 | -0.344392  | -5.272946 | -0.558624 |
| 44 | 1 | 0 | -1.760937  | -5.592136 | -2.140899 |
| 45 | 1 | 0 | 1.019845   | -4.645390 | 0.975304  |
| 46 | 1 | 0 | -0.212727  | -6.328417 | -0.356246 |
| 47 | 7 | 0 | 0.376037   | 1.375064  | 1.640141  |
| 48 | 6 | 0 | 1.254090   | 0.400355  | 2.028944  |
| 49 | 6 | 0 | -0.858486  | 0.821726  | 1.866567  |
| 50 | 6 | 0 | 0.674495   | 2.669153  | 1.139707  |
| 51 | 6 | 0 | 2.653609   | 0.529418  | 1.997180  |
| 52 | 7 | 0 | 0.591666   | -0.653466 | 2.469666  |
| 53 | 7 | 0 | -0.723269  | -0.392497 | 2.366241  |
| 54 | 6 | 0 | -2.064548  | 1.442199  | 1.500236  |
| 55 | 6 | 0 | 0.052188   | 3.777395  | 1.700224  |
| 56 | 6 | 0 | 1.590033   | 2.809452  | 0.105217  |
| 57 | 6 | 0 | 3.860008   | 0.625615  | 1.972217  |
| 58 | 6 | 0 | -3.077725  | 1.967993  | 1.097374  |
| 59 | 6 | 0 | 0.347863   | 5.039097  | 1.209877  |
| 60 | 1 | 0 | -0.652305  | 3.651721  | 2.510891  |
| 61 | 6 | 0 | 1.890117   | 4.078699  | -0.364035 |
| 62 | 1 | 0 | 2.043829   | 1.931584  | -0.332187 |
| 63 | 6 | 0 | 5.270730   | 0.742697  | 1.888023  |
| 64 | 6 | 0 | -4.226139  | 2.601935  | 0.558783  |
| 65 | 6 | 0 | 1.269077   | 5.193642  | 0.183064  |
| 66 | 1 | 0 | -0.137726  | 5.903956  | 1.639056  |
| 67 | 1 | 0 | 2.594468   | 4.191657  | -1.176594 |
| 68 | 6 | 0 | 5.829758   | 1.724729  | 1.074364  |



|     |   |   |            |           |           |
|-----|---|---|------------|-----------|-----------|
| 69  | 6 | 0 | 6.094534   | -0.137418 | 2.602151  |
| 70  | 6 | 0 | -5.506658  | 2.248270  | 1.005509  |
| 71  | 6 | 0 | -4.061547  | 3.553662  | -0.442433 |
| 72  | 1 | 0 | 1.498153   | 6.181482  | -0.196403 |
| 73  | 6 | 0 | 7.208580   | 1.802289  | 0.934246  |
| 74  | 1 | 0 | 5.207449   | 2.422517  | 0.533429  |
| 75  | 6 | 0 | 7.469772   | -0.053495 | 2.458799  |
| 76  | 1 | 0 | 5.639312   | -0.876531 | 3.244883  |
| 77  | 6 | 0 | -6.611428  | 2.874153  | 0.454507  |
| 78  | 1 | 0 | -5.610830  | 1.490942  | 1.765581  |
| 79  | 6 | 0 | -5.175061  | 4.184522  | -0.984622 |
| 80  | 1 | 0 | -3.079482  | 3.795634  | -0.820344 |
| 81  | 6 | 0 | 8.038080   | 0.892415  | 1.588288  |
| 82  | 6 | 0 | -6.451730  | 3.862902  | -0.530671 |
| 83  | 8 | 0 | 9.384392   | 0.968023  | 1.413242  |
| 84  | 8 | 0 | -7.538307  | 4.486942  | -1.065647 |
| 85  | 6 | 0 | 9.955840   | -0.130878 | 0.717155  |
| 86  | 6 | 0 | -8.143085  | 5.433651  | -0.201803 |
| 87  | 1 | 0 | 9.422754   | -0.324278 | -0.216522 |
| 88  | 1 | 0 | 10.984515  | 0.149386  | 0.497562  |
| 89  | 1 | 0 | 9.948203   | -1.030346 | 1.331900  |
| 90  | 1 | 0 | -7.432816  | 6.218230  | 0.073876  |
| 91  | 1 | 0 | -8.970113  | 5.874201  | -0.755401 |
| 92  | 1 | 0 | -8.526108  | 4.950776  | 0.697299  |
| 93  | 8 | 0 | -6.859037  | -5.058711 | 1.253599  |
| 94  | 8 | 0 | -9.121022  | -1.116829 | -0.256877 |
| 95  | 8 | 0 | -7.892671  | 2.624352  | 0.808042  |
| 96  | 8 | 0 | -4.954739  | 5.132482  | -1.926149 |
| 97  | 8 | 0 | 8.354485   | -0.860260 | 3.089748  |
| 98  | 8 | 0 | 7.690748   | 2.754849  | 0.097550  |
| 99  | 8 | 0 | 6.490817   | -3.474208 | -0.657828 |
| 100 | 8 | 0 | 6.996298   | 0.396367  | -3.444958 |
| 101 | 6 | 0 | 8.149337   | 1.028823  | -2.907053 |
| 102 | 1 | 0 | 8.957744   | 0.317440  | -2.744035 |
| 103 | 1 | 0 | 8.455693   | 1.762169  | -3.649979 |
| 104 | 1 | 0 | 7.918309   | 1.544205  | -1.972904 |
| 105 | 6 | 0 | 7.326362   | -3.233753 | 0.461488  |
| 106 | 1 | 0 | 6.760995   | -2.750317 | 1.261087  |
| 107 | 1 | 0 | 7.676468   | -4.207010 | 0.800494  |
| 108 | 1 | 0 | 8.180135   | -2.609925 | 0.191871  |
| 109 | 6 | 0 | -10.110361 | -1.635041 | -1.130803 |
| 110 | 1 | 0 | -10.504504 | -2.583278 | -0.764002 |
| 111 | 1 | 0 | -10.906711 | -0.894868 | -1.165122 |
| 112 | 1 | 0 | -9.704328  | -1.769785 | -2.136828 |
| 113 | 6 | 0 | -8.116852  | 1.633802  | 1.782160  |
| 114 | 1 | 0 | -7.672106  | 1.912534  | 2.742091  |
| 115 | 1 | 0 | -9.195010  | 1.553861  | 1.890197  |
| 116 | 1 | 0 | -7.720575  | 0.667680  | 1.464884  |
| 117 | 6 | 0 | -5.748924  | 5.104972  | -3.099547 |
| 118 | 1 | 0 | -6.618257  | 5.755354  | -3.012250 |
| 119 | 1 | 0 | -5.109467  | 5.453682  | -3.909444 |
| 120 | 1 | 0 | -6.090442  | 4.092408  | -3.318462 |
| 121 | 6 | 0 | -7.533318  | -6.089220 | 0.549310  |
| 122 | 1 | 0 | -7.026892  | -6.306059 | -0.394687 |

|     |   |   |           |           |          |
|-----|---|---|-----------|-----------|----------|
| 123 | 1 | 0 | -7.493887 | -6.970482 | 1.186076 |
| 124 | 1 | 0 | -8.572431 | -5.821524 | 0.353906 |
| 125 | 6 | 0 | 7.852180  | -1.720272 | 4.084259 |
| 126 | 1 | 0 | 7.181013  | -2.475896 | 3.666651 |
| 127 | 1 | 0 | 8.716006  | -2.214334 | 4.521280 |
| 128 | 1 | 0 | 7.321665  | -1.163707 | 4.860855 |
| 129 | 6 | 0 | 8.800466  | 3.528814  | 0.527178 |
| 130 | 1 | 0 | 9.741678  | 3.100581  | 0.186973 |
| 131 | 1 | 0 | 8.665701  | 4.519841  | 0.095918 |
| 132 | 1 | 0 | 8.824561  | 3.607628  | 1.614378 |

### Trimer

| Center<br>Number | Atomic<br>Number | Atomic<br>Type | Coordinates (Angstroms) |           |           |
|------------------|------------------|----------------|-------------------------|-----------|-----------|
|                  |                  |                | X                       | Y         | Z         |
| 1                | 6                | 0              | -0.743085               | -0.071948 | 0.126641  |
| 2                | 6                | 0              | 1.296821                | -0.290175 | 0.798976  |
| 3                | 7                | 0              | 0.003365                | -0.293820 | 1.252901  |
| 4                | 7                | 0              | 1.317772                | -0.075194 | -0.503858 |
| 5                | 6                | 0              | -2.146730               | -0.017100 | 0.100249  |
| 6                | 6                | 0              | 2.405084                | -0.566854 | 1.615338  |
| 7                | 6                | 0              | -3.356233               | 0.016758  | 0.069037  |
| 8                | 6                | 0              | 3.332225                | -0.815065 | 2.351253  |
| 9                | 6                | 0              | -4.772002               | 0.045734  | 0.017069  |
| 10               | 6                | 0              | -5.525333               | -0.052772 | 1.187007  |
| 11               | 6                | 0              | -5.405886               | 0.161098  | -1.225846 |
| 12               | 6                | 0              | -6.907159               | -0.064118 | 1.097627  |
| 13               | 1                | 0              | -5.045728               | -0.134843 | 2.152309  |
| 14               | 6                | 0              | -6.790190               | 0.175833  | -1.301869 |
| 15               | 1                | 0              | -4.797879               | 0.232899  | -2.114422 |
| 16               | 6                | 0              | -7.551874               | 0.052703  | -0.131240 |
| 17               | 6                | 0              | 4.366039                | -1.097177 | 3.277978  |
| 18               | 6                | 0              | 5.670853                | -1.345890 | 2.858987  |
| 19               | 6                | 0              | 4.040958                | -1.124861 | 4.640261  |
| 20               | 6                | 0              | 6.642140                | -1.645927 | 3.802608  |
| 21               | 1                | 0              | 5.933619                | -1.326713 | 1.810759  |
| 22               | 6                | 0              | 5.020564                | -1.406063 | 5.577431  |
| 23               | 1                | 0              | 3.020958                | -0.923276 | 4.931018  |
| 24               | 6                | 0              | 6.331625                | -1.684190 | 5.160265  |
| 25               | 8                | 0              | -8.907436               | -0.016252 | -0.219496 |
| 26               | 8                | 0              | 7.310565                | -1.953948 | 6.064630  |
| 27               | 6                | 0              | -9.595167               | 1.137007  | 0.239804  |
| 28               | 1                | 0              | -9.326748               | 2.016302  | -0.349425 |
| 29               | 1                | 0              | -10.656159              | 0.928556  | 0.116369  |
| 30               | 1                | 0              | -9.376108               | 1.325740  | 1.291215  |
| 31               | 6                | 0              | 7.200294                | -3.224006 | 6.687016  |
| 32               | 1                | 0              | 7.256665                | -4.023399 | 5.944435  |
| 33               | 1                | 0              | 8.043547                | -3.305384 | 7.369512  |
| 34               | 1                | 0              | 6.268886                | -3.305423 | 7.248697  |
| 35               | 7                | 0              | 0.048548                | 0.075162  | -0.920022 |
| 36               | 6                | 0              | -0.447396               | -0.411261 | 2.596063  |
| 37               | 6                | 0              | 0.171514                | 0.345103  | 3.583130  |

|    |   |   |            |           |           |
|----|---|---|------------|-----------|-----------|
| 38 | 6 | 0 | -1.503878  | -1.258446 | 2.901125  |
| 39 | 6 | 0 | -0.276183  | 0.247506  | 4.891170  |
| 40 | 1 | 0 | 0.977081   | 1.019399  | 3.332856  |
| 41 | 6 | 0 | -1.944334  | -1.341620 | 4.212969  |
| 42 | 1 | 0 | -1.959391  | -1.856489 | 2.126722  |
| 43 | 6 | 0 | -1.333618  | -0.593196 | 5.209258  |
| 44 | 1 | 0 | 0.193402   | 0.855151  | 5.653772  |
| 45 | 1 | 0 | -2.760318  | -2.009915 | 4.455145  |
| 46 | 1 | 0 | -1.684147  | -0.662537 | 6.231219  |
| 47 | 7 | 0 | 0.064942   | -3.795529 | -0.662254 |
| 48 | 6 | 0 | -0.997617  | -3.905696 | 0.196232  |
| 49 | 6 | 0 | 1.163420   | -3.944910 | 0.147275  |
| 50 | 6 | 0 | 0.038482   | -3.691933 | -2.077014 |
| 51 | 6 | 0 | -2.342982  | -3.839616 | -0.208388 |
| 52 | 7 | 0 | -0.563381  | -4.123350 | 1.423316  |
| 53 | 7 | 0 | 0.781054   | -4.141870 | 1.394482  |
| 54 | 6 | 0 | 2.479496   | -3.788215 | -0.322340 |
| 55 | 6 | 0 | 0.837071   | -4.545376 | -2.829248 |
| 56 | 6 | 0 | -0.787002  | -2.761870 | -2.692952 |
| 57 | 6 | 0 | -3.497458  | -3.781959 | -0.569626 |
| 58 | 6 | 0 | 3.582509   | -3.581402 | -0.775932 |
| 59 | 6 | 0 | 0.816051   | -4.455103 | -4.211701 |
| 60 | 1 | 0 | 1.467742   | -5.268371 | -2.330144 |
| 61 | 6 | 0 | -0.809638  | -2.692249 | -4.077576 |
| 62 | 1 | 0 | -1.387808  | -2.095210 | -2.092988 |
| 63 | 6 | 0 | -4.835034  | -3.697955 | -1.034532 |
| 64 | 6 | 0 | 4.835098   | -3.288169 | -1.374233 |
| 65 | 6 | 0 | -0.009206  | -3.532298 | -4.838813 |
| 66 | 1 | 0 | 1.441222   | -5.115653 | -4.798176 |
| 67 | 1 | 0 | -1.445566  | -1.961604 | -4.560256 |
| 68 | 6 | 0 | -5.072027  | -3.347211 | -2.360327 |
| 69 | 6 | 0 | -5.904907  | -4.031418 | -0.193348 |
| 70 | 6 | 0 | 6.034231   | -3.527906 | -0.688192 |
| 71 | 6 | 0 | 4.848972   | -2.735328 | -2.651626 |
| 72 | 1 | 0 | -0.025962  | -3.465664 | -5.918918 |
| 73 | 6 | 0 | -6.372069  | -3.297733 | -2.847972 |
| 74 | 1 | 0 | -4.254204  | -3.119396 | -3.029168 |
| 75 | 6 | 0 | -7.196866  | -4.004927 | -0.691232 |
| 76 | 1 | 0 | -5.702122  | -4.330312 | 0.823935  |
| 77 | 6 | 0 | 7.239400   | -3.226212 | -1.303469 |
| 78 | 1 | 0 | 5.999996   | -3.938831 | 0.309544  |
| 79 | 6 | 0 | 6.059456   | -2.429070 | -3.260603 |
| 80 | 1 | 0 | 3.928415   | -2.529799 | -3.178372 |
| 81 | 6 | 0 | -7.447415  | -3.615420 | -2.018640 |
| 82 | 6 | 0 | 7.258378   | -2.681262 | -2.597990 |
| 83 | 8 | 0 | -8.714394  | -3.611019 | -2.506414 |
| 84 | 8 | 0 | 8.445084   | -2.383047 | -3.198384 |
| 85 | 6 | 0 | -9.531786  | -2.552036 | -2.017027 |
| 86 | 6 | 0 | 9.135891   | -3.518637 | -3.691173 |
| 87 | 1 | 0 | -9.126573  | -1.580716 | -2.302429 |
| 88 | 1 | 0 | -10.512151 | -2.696684 | -2.466956 |
| 89 | 1 | 0 | -9.619794  | -2.595649 | -0.931410 |
| 90 | 1 | 0 | 8.538976   | -4.041516 | -4.443047 |
| 91 | 1 | 0 | 10.051100  | -3.149243 | -4.149855 |

|     |   |   |           |           |           |
|-----|---|---|-----------|-----------|-----------|
| 92  | 1 | 0 | 9.388240  | -4.203338 | -2.880344 |
| 93  | 7 | 0 | 0.939430  | 3.954950  | 0.988741  |
| 94  | 6 | 0 | 0.120829  | 3.826827  | 2.078963  |
| 95  | 6 | 0 | 2.202366  | 3.814139  | 1.497626  |
| 96  | 6 | 0 | 0.559536  | 4.189758  | -0.359277 |
| 97  | 6 | 0 | -1.281657 | 3.841977  | 1.980961  |
| 98  | 7 | 0 | 0.846075  | 3.635422  | 3.164793  |
| 99  | 7 | 0 | 2.143212  | 3.626810  | 2.802754  |
| 100 | 6 | 0 | 3.351466  | 3.872905  | 0.691251  |
| 101 | 6 | 0 | 0.996438  | 3.331831  | -1.359125 |
| 102 | 6 | 0 | -0.253136 | 5.278447  | -0.648029 |
| 103 | 6 | 0 | -2.480565 | 3.866073  | 1.816145  |
| 104 | 6 | 0 | 4.282296  | 3.935485  | -0.079403 |
| 105 | 6 | 0 | 0.613577  | 3.580031  | -2.669186 |
| 106 | 1 | 0 | 1.606027  | 2.472517  | -1.114326 |
| 107 | 6 | 0 | -0.635000 | 5.509751  | -1.960130 |
| 108 | 1 | 0 | -0.578746 | 5.928459  | 0.153261  |
| 109 | 6 | 0 | -3.877202 | 3.908232  | 1.570662  |
| 110 | 6 | 0 | 5.332307  | 4.010342  | -1.029394 |
| 111 | 6 | 0 | -0.199052 | 4.664180  | -2.971369 |
| 112 | 1 | 0 | 0.939967  | 2.905759  | -3.449663 |
| 113 | 1 | 0 | -1.269156 | 6.355791  | -2.191176 |
| 114 | 6 | 0 | -4.332037 | 3.958320  | 0.256376  |
| 115 | 6 | 0 | -4.795766 | 3.926230  | 2.624654  |
| 116 | 6 | 0 | 6.666750  | 3.865493  | -0.627631 |
| 117 | 6 | 0 | 5.015933  | 4.227807  | -2.365887 |
| 118 | 1 | 0 | -0.497725 | 4.847330  | -3.995622 |
| 119 | 6 | 0 | -5.689608 | 4.062627  | -0.035177 |
| 120 | 1 | 0 | -3.635684 | 3.932437  | -0.569540 |
| 121 | 6 | 0 | -6.142373 | 4.017112  | 2.338952  |
| 122 | 1 | 0 | -4.473457 | 3.885567  | 3.654762  |
| 123 | 6 | 0 | 7.666635  | 3.917860  | -1.583088 |
| 124 | 1 | 0 | 6.887623  | 3.706551  | 0.416404  |
| 125 | 6 | 0 | 6.024034  | 4.279110  | -3.323997 |
| 126 | 1 | 0 | 3.989089  | 4.348551  | -2.680801 |
| 127 | 6 | 0 | -6.609928 | 4.104795  | 1.018508  |
| 128 | 6 | 0 | 7.353462  | 4.106811  | -2.940545 |
| 129 | 8 | 0 | -7.955585 | 4.227628  | 0.799185  |
| 130 | 8 | 0 | 8.356735  | 4.133515  | -3.863566 |
| 131 | 6 | 0 | -8.462597 | 5.518748  | 1.101416  |
| 132 | 6 | 0 | 8.882883  | 2.853387  | -4.169272 |
| 133 | 1 | 0 | -8.042416 | 6.267535  | 0.425021  |
| 134 | 1 | 0 | -9.540325 | 5.470061  | 0.958051  |
| 135 | 1 | 0 | -8.240974 | 5.789701  | 2.133190  |
| 136 | 1 | 0 | 8.119594  | 2.220706  | -4.632763 |
| 137 | 1 | 0 | 9.695929  | 3.013270  | -4.874927 |
| 138 | 1 | 0 | 9.271461  | 2.364722  | -3.273784 |
| 139 | 8 | 0 | 6.011904  | -1.927878 | -4.517912 |
| 140 | 8 | 0 | 8.456577  | -3.436636 | -0.758601 |
| 141 | 8 | 0 | -7.031188 | 4.098791  | 3.370793  |
| 142 | 8 | 0 | -5.968540 | 4.163204  | -1.353365 |
| 143 | 8 | 0 | -7.670843 | -0.155066 | 2.229286  |
| 144 | 8 | 0 | -7.494939 | 0.318273  | -2.444423 |
| 145 | 8 | 0 | -8.294844 | -4.343904 | 0.025324  |

|     |   |   |           |           |           |
|-----|---|---|-----------|-----------|-----------|
| 146 | 8 | 0 | -6.520691 | -2.905852 | -4.138801 |
| 147 | 8 | 0 | 5.621313  | 4.453857  | -4.603177 |
| 148 | 8 | 0 | 8.985333  | 3.774110  | -1.320954 |
| 149 | 8 | 0 | 4.816559  | -1.447053 | 6.912477  |
| 150 | 8 | 0 | 7.900257  | -1.958282 | 3.376657  |
| 151 | 6 | 0 | -7.441787 | -3.602730 | -4.963834 |
| 152 | 1 | 0 | -8.429690 | -3.144762 | -4.938023 |
| 153 | 1 | 0 | -7.037760 | -3.555898 | -5.975392 |
| 154 | 1 | 0 | -7.530913 | -4.645397 | -4.655669 |
| 155 | 6 | 0 | -8.090186 | -5.030681 | 1.236745  |
| 156 | 1 | 0 | -7.621302 | -4.395140 | 1.992827  |
| 157 | 1 | 0 | -9.075671 | -5.330721 | 1.585608  |
| 158 | 1 | 0 | -7.469273 | -5.918085 | 1.085763  |
| 159 | 6 | 0 | -6.763695 | 0.459066  | -3.643121 |
| 160 | 1 | 0 | -7.501939 | 0.623858  | -4.424201 |
| 161 | 1 | 0 | -6.090349 | 1.319575  | -3.593131 |
| 162 | 1 | 0 | -6.198695 | -0.447212 | -3.871459 |
| 163 | 6 | 0 | -8.163623 | -1.462259 | 2.464576  |
| 164 | 1 | 0 | -7.354921 | -2.121847 | 2.791800  |
| 165 | 1 | 0 | -8.901585 | -1.381782 | 3.259798  |
| 166 | 1 | 0 | -8.632000 | -1.876370 | 1.568142  |
| 167 | 6 | 0 | -7.273431 | 3.983490  | -1.859321 |
| 168 | 1 | 0 | -7.929359 | 4.820136  | -1.615255 |
| 169 | 1 | 0 | -7.153773 | 3.929858  | -2.940322 |
| 170 | 1 | 0 | -7.720766 | 3.058325  | -1.498786 |
| 171 | 6 | 0 | -7.825096 | 2.936949  | 3.555565  |
| 172 | 1 | 0 | -8.406981 | 3.105722  | 4.459244  |
| 173 | 1 | 0 | -8.495479 | 2.780971  | 2.710062  |
| 174 | 1 | 0 | -7.201755 | 2.050064  | 3.681052  |
| 175 | 6 | 0 | 6.422187  | 5.212213  | -5.493556 |
| 176 | 1 | 0 | 7.145039  | 4.586908  | -6.018341 |
| 177 | 1 | 0 | 5.732234  | 5.651895  | -6.212628 |
| 178 | 1 | 0 | 6.959945  | 6.004037  | -4.970294 |
| 179 | 6 | 0 | 9.360037  | 3.569574  | 0.019550  |
| 180 | 1 | 0 | 8.926025  | 2.649652  | 0.422062  |
| 181 | 1 | 0 | 10.443814 | 3.487427  | 0.021267  |
| 182 | 1 | 0 | 9.060293  | 4.411311  | 0.649889  |
| 183 | 6 | 0 | 8.897514  | -1.010891 | 3.721010  |
| 184 | 1 | 0 | 8.993636  | -0.919361 | 4.802485  |
| 185 | 1 | 0 | 9.830133  | -1.380917 | 3.299511  |
| 186 | 1 | 0 | 8.668847  | -0.033482 | 3.286780  |
| 187 | 6 | 0 | 3.513725  | -1.183507 | 7.377965  |
| 188 | 1 | 0 | 2.797804  | -1.919153 | 7.001313  |
| 189 | 1 | 0 | 3.562145  | -1.248241 | 8.461772  |
| 190 | 1 | 0 | 3.181892  | -0.182100 | 7.090736  |
| 191 | 6 | 0 | 6.823136  | -0.807639 | -4.821647 |
| 192 | 1 | 0 | 7.794027  | -1.109755 | -5.208378 |
| 193 | 1 | 0 | 6.283568  | -0.236641 | -5.576403 |
| 194 | 1 | 0 | 6.977165  | -0.185884 | -3.938939 |
| 195 | 6 | 0 | 8.506438  | -3.990286 | 0.537956  |
| 196 | 1 | 0 | 8.014406  | -4.966515 | 0.571967  |
| 197 | 1 | 0 | 9.561578  | -4.115085 | 0.768174  |
| 198 | 1 | 0 | 8.055341  | -3.326441 | 1.278744  |

## Tetramer

| Center<br>Number | Atomic<br>Number | Atomic<br>Type | Coordinates (Angstroms) |           |           |
|------------------|------------------|----------------|-------------------------|-----------|-----------|
|                  |                  |                | X                       | Y         | Z         |
| 1                | 6                | 0              | 0.833089                | -2.048706 | -0.080757 |
| 2                | 6                | 0              | -1.241926               | -2.132372 | -0.668445 |
| 3                | 7                | 0              | 0.000617                | -1.802433 | -1.139350 |
| 4                | 7                | 0              | -1.154998               | -2.553014 | 0.580370  |
| 5                | 6                | 0              | 2.222108                | -1.843143 | -0.115284 |
| 6                | 6                | 0              | -2.406924               | -2.054819 | -1.447602 |
| 7                | 6                | 0              | 3.418488                | -1.671027 | -0.177320 |
| 8                | 6                | 0              | -3.379939               | -1.984482 | -2.162355 |
| 9                | 6                | 0              | 4.814069                | -1.496055 | -0.341150 |
| 10               | 6                | 0              | 5.324579                | -1.243923 | -1.618765 |
| 11               | 6                | 0              | 5.687372                | -1.584697 | 0.742183  |
| 12               | 6                | 0              | 6.683053                | -1.086958 | -1.799116 |
| 13               | 1                | 0              | 4.662430                | -1.154934 | -2.468938 |
| 14               | 6                | 0              | 7.053049                | -1.439696 | 0.554876  |
| 15               | 1                | 0              | 5.304920                | -1.761137 | 1.738146  |
| 16               | 6                | 0              | 7.569094                | -1.176024 | -0.715998 |
| 17               | 6                | 0              | -4.479915               | -1.893417 | -3.050059 |
| 18               | 6                | 0              | -5.727456               | -2.401045 | -2.694182 |
| 19               | 6                | 0              | -4.293363               | -1.276465 | -4.293931 |
| 20               | 6                | 0              | -6.779326               | -2.316298 | -3.593220 |
| 21               | 1                | 0              | -5.880691               | -2.872641 | -1.733478 |
| 22               | 6                | 0              | -5.352768               | -1.183841 | -5.181241 |
| 23               | 1                | 0              | -3.316878               | -0.884704 | -4.536981 |
| 24               | 6                | 0              | -6.604285               | -1.719998 | -4.840429 |
| 25               | 8                | 0              | 8.888755                | -1.040881 | -0.988982 |
| 26               | 8                | 0              | -7.659860               | -1.627696 | -5.692634 |
| 27               | 6                | 0              | 9.687606                | -0.227670 | -0.138636 |
| 28               | 1                | 0              | 10.084443               | -0.799128 | 0.698723  |
| 29               | 1                | 0              | 10.507833               | 0.132658  | -0.759206 |
| 30               | 1                | 0              | 9.122563                | 0.624646  | 0.241046  |
| 31               | 6                | 0              | -7.566318               | -2.468010 | -6.832164 |
| 32               | 1                | 0              | -7.529658               | -3.518613 | -6.535347 |
| 33               | 1                | 0              | -8.465188               | -2.289546 | -7.416922 |
| 34               | 1                | 0              | -6.687717               | -2.220866 | -7.430756 |
| 35               | 7                | 0              | 0.138096                | -2.502184 | 0.945143  |
| 36               | 6                | 0              | 0.353004                | -1.316176 | -2.427571 |
| 37               | 6                | 0              | -0.327725               | -0.232970 | -2.967286 |
| 38               | 6                | 0              | 1.384909                | -1.934399 | -3.120921 |
| 39               | 6                | 0              | 0.031663                | 0.225314  | -4.226361 |
| 40               | 1                | 0              | -1.110064               | 0.253626  | -2.401940 |
| 41               | 6                | 0              | 1.735651                | -1.463071 | -4.375344 |
| 42               | 1                | 0              | 1.891992                | -2.784445 | -2.689659 |
| 43               | 6                | 0              | 1.059808                | -0.386210 | -4.931330 |
| 44               | 1                | 0              | -0.485052               | 1.080171  | -4.643141 |
| 45               | 1                | 0              | 2.528026                | -1.955187 | -4.924238 |
| 46               | 1                | 0              | 1.335721                | -0.021977 | -5.912778 |
| 47               | 7                | 0              | 0.538843                | -5.808393 | -1.029591 |
| 48               | 6                | 0              | 1.455555                | -5.520918 | -2.007268 |

|     |   |   |           |           |           |
|-----|---|---|-----------|-----------|-----------|
| 49  | 6 | 0 | -0.672027 | -5.663301 | -1.657408 |
| 50  | 6 | 0 | 0.790773  | -6.229913 | 0.302096  |
| 51  | 6 | 0 | 2.847460  | -5.544506 | -1.809519 |
| 52  | 7 | 0 | 0.835612  | -5.232081 | -3.135641 |
| 53  | 7 | 0 | -0.487851 | -5.315459 | -2.917419 |
| 54  | 6 | 0 | -1.904767 | -5.802443 | -0.997476 |
| 55  | 6 | 0 | 0.156569  | -7.365331 | 0.790374  |
| 56  | 6 | 0 | 1.676461  | -5.512282 | 1.094318  |
| 57  | 6 | 0 | 4.038259  | -5.543481 | -1.589131 |
| 58  | 6 | 0 | -2.939552 | -5.885420 | -0.375326 |
| 59  | 6 | 0 | 0.408565  | -7.777925 | 2.089480  |
| 60  | 1 | 0 | -0.523516 | -7.915750 | 0.154872  |
| 61  | 6 | 0 | 1.930070  | -5.942763 | 2.386775  |
| 62  | 1 | 0 | 2.144677  | -4.619605 | 0.707624  |
| 63  | 6 | 0 | 5.416702  | -5.536132 | -1.260134 |
| 64  | 6 | 0 | -4.116228 | -5.974204 | 0.410960  |
| 65  | 6 | 0 | 1.297510  | -7.071601 | 2.887909  |
| 66  | 1 | 0 | -0.087375 | -8.659719 | 2.473436  |
| 67  | 1 | 0 | 2.610623  | -5.377092 | 3.009597  |
| 68  | 6 | 0 | 5.802302  | -5.724309 | 0.066333  |
| 69  | 6 | 0 | 6.390985  | -5.343257 | -2.245833 |
| 70  | 6 | 0 | -5.381372 | -5.930738 | -0.192185 |
| 71  | 6 | 0 | -3.992414 | -6.088634 | 1.792591  |
| 72  | 1 | 0 | 1.492210  | -7.398018 | 3.901209  |
| 73  | 6 | 0 | 7.141456  | -5.667811 | 0.412935  |
| 74  | 1 | 0 | 5.066345  | -5.902530 | 0.837801  |
| 75  | 6 | 0 | 7.731831  | -5.301198 | -1.898254 |
| 76  | 1 | 0 | 6.084022  | -5.242271 | -3.276171 |
| 77  | 6 | 0 | -6.513355 | -6.030475 | 0.601212  |
| 78  | 1 | 0 | -5.451364 | -5.822878 | -1.263939 |
| 79  | 6 | 0 | -5.130890 | -6.178906 | 2.583753  |
| 80  | 1 | 0 | -3.020558 | -6.099413 | 2.264294  |
| 81  | 6 | 0 | 8.119860  | -5.408526 | -0.552411 |
| 82  | 6 | 0 | -6.392931 | -6.167153 | 1.993823  |
| 83  | 8 | 0 | 9.407715  | -5.353138 | -0.139234 |
| 84  | 8 | 0 | -7.509280 | -6.275122 | 2.767629  |
| 85  | 6 | 0 | 10.247087 | -4.322796 | -0.645222 |
| 86  | 6 | 0 | -8.105840 | -7.560245 | 2.721010  |
| 87  | 1 | 0 | 9.690375  | -3.395893 | -0.794015 |
| 88  | 1 | 0 | 11.012700 | -4.165733 | 0.113165  |
| 89  | 1 | 0 | 10.712083 | -4.619626 | -1.583171 |
| 90  | 1 | 0 | -7.415565 | -8.322864 | 3.091688  |
| 91  | 1 | 0 | -8.980876 | -7.519965 | 3.366960  |
| 92  | 1 | 0 | -8.416826 | -7.808317 | 1.704825  |
| 93  | 7 | 0 | -0.547542 | 1.741478  | 1.240192  |
| 94  | 6 | 0 | 0.212572  | 2.209790  | 0.201270  |
| 95  | 6 | 0 | -1.831393 | 1.784673  | 0.761485  |
| 96  | 6 | 0 | -0.101520 | 1.261114  | 2.501038  |
| 97  | 7 | 0 | -1.400507 | 5.698846  | 1.109244  |
| 98  | 6 | 0 | 1.611624  | 2.347141  | 0.240357  |
| 99  | 7 | 0 | -0.562438 | 2.498732  | -0.827955 |
| 100 | 7 | 0 | -1.835794 | 2.238013  | -0.479253 |
| 101 | 6 | 0 | -2.947498 | 1.441381  | 1.541869  |
| 102 | 6 | 0 | -0.554770 | 0.030721  | 2.958896  |

|     |   |   |           |           |           |
|-----|---|---|-----------|-----------|-----------|
| 103 | 6 | 0 | 0.794534  | 2.017708  | 3.243483  |
| 104 | 6 | 0 | -0.426473 | 5.484471  | 2.048325  |
| 105 | 6 | 0 | -2.554799 | 5.302365  | 1.734357  |
| 106 | 6 | 0 | -1.254543 | 6.287304  | -0.174294 |
| 107 | 6 | 0 | 2.815385  | 2.467805  | 0.290891  |
| 108 | 6 | 0 | -3.849318 | 1.133709  | 2.287726  |
| 109 | 6 | 0 | -0.103144 | -0.440720 | 4.181987  |
| 110 | 1 | 0 | -1.229972 | -0.562914 | 2.358782  |
| 111 | 6 | 0 | 1.245708  | 1.529019  | 4.459221  |
| 112 | 1 | 0 | 1.121549  | 2.978322  | 2.874493  |
| 113 | 6 | 0 | 0.936275  | 5.741429  | 1.823565  |
| 114 | 7 | 0 | -0.963562 | 5.010981  | 3.156917  |
| 115 | 7 | 0 | -2.287864 | 4.893589  | 2.960045  |
| 116 | 6 | 0 | -3.799671 | 5.264484  | 1.083482  |
| 117 | 6 | 0 | -2.084812 | 7.339777  | -0.539624 |
| 118 | 6 | 0 | -0.269814 | 5.825703  | -1.037284 |
| 119 | 6 | 0 | 4.223799  | 2.595363  | 0.399858  |
| 120 | 6 | 0 | -4.840725 | 0.745612  | 3.223733  |
| 121 | 6 | 0 | 0.797098  | 0.303353  | 4.931834  |
| 122 | 1 | 0 | -0.442749 | -1.406989 | 4.530622  |
| 123 | 1 | 0 | 1.939979  | 2.118848  | 5.043575  |
| 124 | 6 | 0 | 2.101374  | 5.950750  | 1.569873  |
| 125 | 6 | 0 | -4.832121 | 5.245696  | 0.452908  |
| 126 | 6 | 0 | -1.930350 | 7.926650  | -1.786034 |
| 127 | 1 | 0 | -2.837568 | 7.694759  | 0.150983  |
| 128 | 6 | 0 | -0.116789 | 6.430493  | -2.275085 |
| 129 | 1 | 0 | 0.352959  | 4.992468  | -0.750540 |
| 130 | 6 | 0 | 4.841603  | 2.362439  | 1.629671  |
| 131 | 6 | 0 | 5.001292  | 2.928750  | -0.711352 |
| 132 | 6 | 0 | -6.182009 | 0.630602  | 2.843130  |
| 133 | 6 | 0 | -4.442426 | 0.455534  | 4.528424  |
| 134 | 1 | 0 | 1.152585  | -0.073655 | 5.882456  |
| 135 | 6 | 0 | 3.450158  | 6.208570  | 1.219806  |
| 136 | 6 | 0 | -6.007451 | 5.243621  | -0.339413 |
| 137 | 6 | 0 | -0.944050 | 7.477915  | -2.653658 |
| 138 | 1 | 0 | -2.576591 | 8.746431  | -2.071772 |
| 139 | 1 | 0 | 0.645414  | 6.065355  | -2.951010 |
| 140 | 6 | 0 | 6.216278  | 2.485767  | 1.761119  |
| 141 | 1 | 0 | 4.258875  | 2.089951  | 2.498318  |
| 142 | 6 | 0 | 6.375334  | 3.034609  | -0.585496 |
| 143 | 1 | 0 | 4.550596  | 3.101181  | -1.678255 |
| 144 | 6 | 0 | -7.121738 | 0.209907  | 3.772943  |
| 145 | 1 | 0 | -6.457711 | 0.859652  | 1.825323  |
| 146 | 6 | 0 | -5.390717 | 0.048655  | 5.455784  |
| 147 | 1 | 0 | -3.398065 | 0.535051  | 4.794286  |
| 148 | 6 | 0 | 3.747243  | 6.659526  | -0.066202 |
| 149 | 6 | 0 | 4.469865  | 6.018048  | 2.159475  |
| 150 | 6 | 0 | -7.265342 | 5.026885  | 0.227731  |
| 151 | 6 | 0 | -5.897254 | 5.484541  | -1.712876 |
| 152 | 1 | 0 | -0.822665 | 7.942921  | -3.623528 |
| 153 | 6 | 0 | 6.999249  | 2.828039  | 0.652173  |
| 154 | 6 | 0 | -6.731015 | -0.075210 | 5.090105  |
| 155 | 6 | 0 | 5.062932  | 6.930652  | -0.403285 |
| 156 | 1 | 0 | 2.964933  | 6.815493  | -0.795570 |



|     |   |   |            |           |           |
|-----|---|---|------------|-----------|-----------|
| 157 | 6 | 0 | 5.784379   | 6.296878  | 1.816511  |
| 158 | 1 | 0 | 4.214913   | 5.661123  | 3.145562  |
| 159 | 6 | 0 | -8.398230  | 5.018190  | -0.570943 |
| 160 | 1 | 0 | -7.372813  | 4.845069  | 1.287641  |
| 161 | 6 | 0 | -7.030471  | 5.489347  | -2.503874 |
| 162 | 1 | 0 | -4.932957  | 5.659934  | -2.169099 |
| 163 | 8 | 0 | 8.351680   | 2.932486  | 0.792034  |
| 164 | 8 | 0 | -7.677050  | -0.420795 | 5.999266  |
| 165 | 6 | 0 | 6.086161   | 6.754653  | 0.526245  |
| 166 | 6 | 0 | -8.288374  | 5.237015  | -1.947023 |
| 167 | 6 | 0 | 8.871928   | 4.248613  | 0.607408  |
| 168 | 6 | 0 | -7.670339  | -1.789900 | 6.353630  |
| 169 | 8 | 0 | 7.377879   | 7.033860  | 0.196666  |
| 170 | 8 | 0 | -9.405419  | 5.210385  | -2.728638 |
| 171 | 1 | 0 | 8.455867   | 4.931605  | 1.345962  |
| 172 | 1 | 0 | 9.949289   | 4.165396  | 0.737992  |
| 173 | 1 | 0 | 8.644952   | 4.624658  | -0.390813 |
| 174 | 1 | 0 | -6.712783  | -2.076153 | 6.789664  |
| 175 | 1 | 0 | -8.458610  | -1.921495 | 7.092517  |
| 176 | 1 | 0 | -7.883976  | -2.418415 | 5.485583  |
| 177 | 6 | 0 | 7.665903   | 8.423795  | 0.177305  |
| 178 | 6 | 0 | -9.478171  | 4.076229  | -3.584433 |
| 179 | 1 | 0 | 7.527462   | 8.859502  | 1.169713  |
| 180 | 1 | 0 | 8.709749   | 8.520014  | -0.114838 |
| 181 | 1 | 0 | 7.033053   | 8.940372  | -0.546501 |
| 182 | 1 | 0 | -9.539288  | 3.157782  | -2.996596 |
| 183 | 1 | 0 | -10.387674 | 4.192304  | -4.170266 |
| 184 | 1 | 0 | -8.613454  | 4.034132  | -4.247993 |
| 185 | 8 | 0 | 5.353534   | 7.428571  | -1.638030 |
| 186 | 8 | 0 | 6.836149   | 6.182879  | 2.655267  |
| 187 | 8 | 0 | 7.088172   | 3.411427  | -1.685454 |
| 188 | 8 | 0 | 6.719731   | 2.338036  | 3.012144  |
| 189 | 8 | 0 | 7.163574   | -0.778160 | -3.037760 |
| 190 | 8 | 0 | 7.914126   | -1.480690 | 1.614644  |
| 191 | 8 | 0 | 8.739590   | -5.177185 | -2.799100 |
| 192 | 8 | 0 | 7.472267   | -5.822650 | 1.724874  |
| 193 | 8 | 0 | -4.953051  | -6.323091 | 3.918212  |
| 194 | 8 | 0 | -7.781962  | -6.034462 | 0.137986  |
| 195 | 8 | 0 | -5.077920  | -0.289883 | 6.735958  |
| 196 | 8 | 0 | -8.437345  | 0.055594  | 3.517483  |
| 197 | 8 | 0 | -5.283028  | -0.604212 | -6.400876 |
| 198 | 8 | 0 | -7.983757  | -2.865265 | -3.262434 |
| 199 | 8 | 0 | -9.596365  | 4.728526  | 0.004460  |
| 200 | 8 | 0 | -6.905154  | 5.687489  | -3.848605 |
| 201 | 6 | 0 | 6.589834   | 5.654889  | 3.940385  |
| 202 | 1 | 0 | 6.206402   | 4.634114  | 3.880849  |
| 203 | 1 | 0 | 7.551395   | 5.646306  | 4.447328  |
| 204 | 1 | 0 | 5.895044   | 6.285020  | 4.502375  |
| 205 | 6 | 0 | 7.923274   | 1.609959  | 3.199476  |
| 206 | 1 | 0 | 8.798060   | 2.250161  | 3.097377  |
| 207 | 1 | 0 | 7.874018   | 1.213640  | 4.212836  |
| 208 | 1 | 0 | 7.997921   | 0.778823  | 2.497693  |
| 209 | 6 | 0 | 8.043761   | -2.741533 | 2.252098  |
| 210 | 1 | 0 | 8.597832   | -3.444788 | 1.628398  |

|     |   |   |            |           |           |
|-----|---|---|------------|-----------|-----------|
| 211 | 1 | 0 | 8.590243   | -2.564415 | 3.176000  |
| 212 | 1 | 0 | 7.072606   | -3.179861 | 2.487200  |
| 213 | 6 | 0 | 6.007865   | 6.500320  | -2.490591 |
| 214 | 1 | 0 | 5.356937   | 5.649536  | -2.705100 |
| 215 | 1 | 0 | 6.225935   | 7.032620  | -3.414472 |
| 216 | 1 | 0 | 6.931855   | 6.135615  | -2.043404 |
| 217 | 6 | 0 | 8.074791   | 2.502684  | -2.152654 |
| 218 | 1 | 0 | 8.414881   | 2.900265  | -3.107496 |
| 219 | 1 | 0 | 8.920597   | 2.438569  | -1.466270 |
| 220 | 1 | 0 | 7.655355   | 1.508136  | -2.312425 |
| 221 | 6 | 0 | 7.836716   | -1.844366 | -3.679355 |
| 222 | 1 | 0 | 7.127378   | -2.636707 | -3.936650 |
| 223 | 1 | 0 | 8.266490   | -1.437112 | -4.592670 |
| 224 | 1 | 0 | 8.630079   | -2.256912 | -3.052697 |
| 225 | 6 | 0 | 8.446751   | -5.466028 | -4.146532 |
| 226 | 1 | 0 | 7.831224   | -4.690305 | -4.608325 |
| 227 | 1 | 0 | 9.403220   | -5.509870 | -4.662060 |
| 228 | 1 | 0 | 7.935474   | -6.427678 | -4.239496 |
| 229 | 6 | 0 | 8.290133   | -6.942647 | 2.026138  |
| 230 | 1 | 0 | 9.301988   | -6.811276 | 1.643808  |
| 231 | 1 | 0 | 8.311743   | -7.018011 | 3.111618  |
| 232 | 1 | 0 | 7.859855   | -7.858291 | 1.612704  |
| 233 | 6 | 0 | -7.441079  | 6.918564  | -4.304948 |
| 234 | 1 | 0 | -6.919640  | 7.760223  | -3.843496 |
| 235 | 1 | 0 | -7.279166  | 6.943797  | -5.379157 |
| 236 | 1 | 0 | -8.508350  | 6.989897  | -4.092236 |
| 237 | 6 | 0 | -10.565947 | 5.761742  | -0.053335 |
| 238 | 1 | 0 | -10.891948 | 5.943756  | -1.077216 |
| 239 | 1 | 0 | -11.406941 | 5.420722  | 0.546894  |
| 240 | 1 | 0 | -10.172928 | 6.688185  | 0.375406  |
| 241 | 6 | 0 | -5.737778  | -5.523103 | 4.786570  |
| 242 | 1 | 0 | -6.643047  | -6.041048 | 5.098388  |
| 243 | 1 | 0 | -5.114713  | -5.313413 | 5.655299  |
| 244 | 1 | 0 | -6.018526  | -4.583619 | 4.309083  |
| 245 | 6 | 0 | -4.224032  | 0.594951  | 7.431777  |
| 246 | 1 | 0 | -4.695283  | 1.573989  | 7.551457  |
| 247 | 1 | 0 | -4.058845  | 0.150650  | 8.410353  |
| 248 | 1 | 0 | -3.259301  | 0.725024  | 6.937489  |
| 249 | 6 | 0 | -9.015668  | -1.917286 | -3.046345 |
| 250 | 1 | 0 | -9.170137  | -1.294905 | -3.929352 |
| 251 | 1 | 0 | -9.919064  | -2.488026 | -2.838901 |
| 252 | 1 | 0 | -8.783131  | -1.284813 | -2.182775 |
| 253 | 6 | 0 | -4.064738  | 0.009493  | -6.754486 |
| 254 | 1 | 0 | -3.247837  | -0.712077 | -6.801844 |
| 255 | 1 | 0 | -4.218921  | 0.442903  | -7.737918 |
| 256 | 1 | 0 | -3.802259  | 0.798823  | -6.047106 |
| 257 | 6 | 0 | -7.972860  | -5.924553 | -1.254040 |
| 258 | 1 | 0 | -7.466685  | -6.731939 | -1.790528 |
| 259 | 1 | 0 | -9.044685  | -6.004379 | -1.416205 |
| 260 | 1 | 0 | -7.627862  | -4.961922 | -1.638312 |
| 261 | 6 | 0 | -8.890757  | 0.395484  | 2.231207  |
| 262 | 1 | 0 | -8.435211  | -0.237518 | 1.463774  |
| 263 | 1 | 0 | -9.965436  | 0.232951  | 2.237983  |
| 264 | 1 | 0 | -8.685490  | 1.443906  | 1.995908  |

## 7. References.

- S-1.- Gaussian 09, Revision A.1, M. J. Frisch, G. W. Trucks, H. B. Schlegel, G. E. Scuseria, M. A. Robb, J. R. Cheeseman, G. Scalmani, V. Barone, B. Mennucci, G. A. Petersson, H. Nakatsuji, M. Caricato, X. Li, X. H. P. Hratchian, A. F. Izmaylov, J. Bloino, G. Zheng, J. L. Sonnenberg, M. Hada, M. Ehara, K. Toyota, R. Fukuda, J. Hasegawa, M. Ishida, T. Nakajima, Y. Honda, O. Kitao, H. Nakai, T. Vreven, Jr. J. A. Montgomery, J. E. Peralta, F. Ogliaro, M. Bearpark, J. J. Heyd, E. Brothers, K. N. Kudin, V. N. Staroverov, R. Kobayashi, J. Normand, K. Raghavachari, A. Rendell, A. J. C. Burant, S. S. Iyengar, S. J. Tomasi, M. Cossi, N. Rega, N. J. Millam, M. Klene, J. E. Knox, J. B. Cross, V. Bakken, C. Adamo, J. Jaramillo, R. Gomperts, R. E. Stratmann, O. Yazyev, O. A. J. Austin, R. Cammi, C. Pomelli, J. W. Ochterski, R. L. Martin, K. Morokuma, V. G. Zakrzewski, G. A. Voth, P. Salvador, J. J. Dannenberg, S. Dapprich, A. D. Daniels, O. Farkas, J. B. Foresman, J. V. Ortiz, J. Cioslowski, D. J. Fox, Gaussian, Inc., Wallingford CT, **2009**.
- S-2.- R. G. Parr, W. Yang, in *Density-Functional Theory of Atoms and Molecules*, Oxford University Press, New York, **1994**.
- S-3.- a) W. Kohn, A. D. Becke and R. G. J. Parr, *Phys. Chem.* 1996, **100**, 12974; b) A. D. Becke, *J. Chem. Soc.* **1993**, *98*, 5648. c) A. D. Becke, *Phys. Rev. A* 1988, **38**, 3098.
- S-4.- a) R. Ditchfield, W. J. Hehre and J. A. Pople, *J. Chem. Phys.* 1971, **54**, 724; b) W. J. Hehre, R. Ditchfield and J. A. Pople, *J. Chem. Phys.* 1972, **56**, 2257; c) P. C. Hariharan and J. A. Pople, *Theor. Chim. Acta* 1973, **28**, 213; d) P. C. Hariharan and J. A. Pople, *Mol. Phys.* 1974, **27**, 209; e) M. S. Gordon, *Chem. Phys. Lett.* 1980, **76**, 163.
- S-5.- Y. Zhao and D. G. Truhlar, *J. Chem. Theory Comput.* 2007, **3**, 289.
- S-6.- M. M. Francl, W. J. Pietro, W. J. Hehre, J. S. Binkley, M. S. Gordon, D. J. Defrees and J. A. Pople, *J. Chem. Phys.* 1982, **77**, 3654.
- S-7.- a) J. L. López, E. M. Pérez, P. M. Viruela, R. Viruela, E. Ortí and N. Martín, *Org. Lett.* 2009, **11**, 4524; b) A. D. Becke, *J. Chem. Phys.* 1993, **98**, 1372; c) S. Tsuzuki and H. P. Luthi, *Chem. Phys.* 2001, **114**, 3949; d) Y. Zhao and D. G. Truhlar, *J. Chem. Theory Comput.* 2005, **1**, 415.
- S-8.- N. R. Kestner and J. E. Combariza. Review in *Comp. Chem.*, Ch. 2, Wiley-VCH. New York, **1999**.
- S-9.- a) S. F. Boys and F. Bernardi, *Mol. Phys.* 1970, **19**, 553; b) D. W. Schwenke and D. G. Truhlar, *J. Chem. Phys.* 1985, **82**, 2418.
- S-10.- a) T. H. Dunning, Jr., *J. Chem. Phys.* 1989, **90**, 1007; b) D. Woon and T. H. Dunning, Jr., *J. Chem. Phys.* 1995, **103**, 4572.
- S-11.- C-Q Ma, W. Pisula, C. Weber, X-L. Feng, K. Müllen and P. Buerle. *Chem. Eur. J.* **2011**, **17**, 1507.
